**(Title):** Effectiveness of fusion peptide-based vaccine TT-P0 on the dynamics of salmon lice (*Lepeophtheirus salmonis*) infection in Atlantic salmon (*Salmo salar* L.)

**(Short title):** TT-P0 vaccine and salmon lice infection

**(Authors):** Jaya Kumari Swain<sup>1, #a¶\*</sup>, Yamila Carpio<sup>2¶\*</sup>, Lill-Heidi Johansen<sup>1</sup>, Janet Velazquez<sup>2</sup>, Liz Hernandez<sup>2</sup>, Yeny Leal<sup>2</sup>, Ajey Kumar<sup>3</sup>, Mario Pablo Estrada<sup>2\*</sup>

**(Affiliations):** <sup>1</sup>Nofima, Tromsø, Norway

<sup>2</sup>Animal Biotechnology Division, Center for Genetic Engineering and Biotechnology, Havana, Cuba

<sup>3</sup>Symbiosis Centre for Information Technology, Symbiosis International (Deemed University), India

<sup>#a</sup>Current address: Fish Immunology and Vaccinology Research Group, Norwegian College of Fishery Science, UiT- The Arctic University of Norway, Tromsø, Norway

\*Corresponding authors:

E-mail: [jaya.k.swain@uit.no](mailto:jaya.k.swain@uit.no)

E-mail: [yamila.carpio@cigb.edu.cu](mailto:yamila.carpio@cigb.edu.cu)

E-mail: [mario.pablo@cigb.edu.cu](mailto:mario.pablo@cigb.edu.cu)

<sup>¶</sup>Both authors contributed equally to this work

## Abstract

Infection with parasitic copepod salmon louse *Lepeophtheirus salmonis*, represents one of the most important limitations to sustainable Atlantic salmon (*Salmo salar* L.) farming today in the North Atlantic region. The parasite exerts negative impact on health, growth and welfare of farmed fish as well as impact on wild salmonid populations. It is therefore central to ensure continuous low level of salmon lice with the least possible handling of the salmon and drug use. This necessitates development of an alternative preventive strategy that can document both effect on lice and that fish welfare is maintained in a satisfactory manner with high economic impact. To address this, vaccination is a cost-effective and environmentally free control approach avoiding the disadvantages of chemical and mechanical treatments. In this study, efficacy of a vaccine candidate (TT-P0), encompassing a peptide derived from ribosomal protein P0 and promiscuous T cell epitopes from tetanus toxin and measles virus, was validated post infestation with *L. salmonis*, at the lab-scale. The sampling results showed good potential of the TT-P0 vaccine in limiting the ectoparasite load, when administered intraperitoneal in the host, by affecting the total adult lice female counts and fecundity, with greater presumptive effect in F1 lice generation. This consequently speculate vaccine's potential to reduce the amount and frequency of chemical drug, mechanical treatment and handling stress, currently used in salmon farming practices, thus improving the fish welfare, environment and economy. On the other hand, the vaccine showed minimal secondary effects and differential modulation of pro-inflammatory, Th1, Th2 and T regulatory mediators at the transcript level with respect to different lice stages in the vaccinated groups as compared to control. Overall, the results indicated potential effectiveness of TT-P0 antigen as a good and safe vaccine candidate against salmon lice. This is a very important preliminary documentation of the TT-P0 vaccine, as a preventive measure, for sustainable and profitable growth of the salmon industry. However, further validation is necessary under field conditions.

## Author summary

Reducing the impact of salmon lice is a major concern for salmon producers around the globe. These parasitic copepods feed on host mucus, skin and blood, causing a negative impact due to reduction in host immune competence and making them more susceptible to other infections or by transmitting pathogens to the host. Farmed salmon populations are the main reservoirs and increasing numbers of salmon lice in the farms, negatively impacts' wild salmon populations. The available control methods rely mainly on pesticides and other physical and biological treatment methods with their own limitations. In this context, development of an efficient vaccine would represent a significant advancement in sea lice control strategy, providing a practical, eco-friendly and sustainable solution with good fish welfare. However, identification of proper vaccine candidates and demonstration of their efficacy have been the main constraints for vaccine development. In the present research, we evaluated the effectiveness of a novel vaccine candidate in a laboratory trial and demonstrated that immunization with this formulation by intraperitoneal injection route, reduced total adult female counts and fecundity with minor secondary effects on the salmon. The results suggest the potential of this novel vaccine candidate against salmon lice by reducing the parasite load and minimizing the current treatment frequencies and handling stress and thus supports further investigations under field conditions as an important next step to demonstrate the effectiveness of the vaccine candidate to control lice infestations in salmon aquaculture.

## 68 Introduction

69 Atlantic salmon (*Salmo salar* L.) is the most important economical species in aquaculture with a  
70 production value of 14.7 billion US dollars in 2014 [1] with Norway, Chile and Scotland being the top  
71 three salmon producers. However, with increased production the alarm about the impact and  
72 number of diseases has also augmented, with parasitic salmon lice emerging as one of the most  
73 important in recent years in all the major salmon-producing countries including Norway.

74 Two lice species represents the primary concern for salmon farming: *Lepeophtheirus salmonis* in the  
75 Northern Hemisphere and *Caligus rogercresseyi* in the Southern Hemisphere [2]. In this study, we  
76 focused on, a single caligid copepod species *L. salmonis*, which predominates in the North Atlantic,  
77 causing year-round infestations of Atlantic salmon housed in marine cages, with concomitant  
78 ramifications for fish health in both farmed and wild salmonids as well as for aquaculture economics  
79 and sustainability [3]. However, the introduction of more and more salmon farms has significantly  
80 increased both the number and density of available susceptible hosts as well as parasite abundance  
81 in the coastal waters round the year [4].

82 Sea lice parasitize salmon during the marine phase of the life cycle, in both wild and farmed salmon,  
83 by attaching to their skin or fins; feeding on the mucus, epithelial tissues and blood; reproducing on  
84 the host and releasing the eggs into the seawater. In seawater, the eggs hatch and develop into  
85 planktonic infective stages to parasitize the available host repeatedly [5], thus causing increased  
86 parasitic burden on the hosts. If left untreated, this might lead to impaired growth, osmoregulatory  
87 stress and open wounds, which can facilitate the entry of other pathogens [5, 6]. The impaired  
88 growth and secondary infections cause significant negative animal welfare and economic impact [7].  
89 Moreover, relative to other salmonids, Atlantic salmon have limited ability to resist infection by *L.*  
90 *salmonis* and is therefore highly susceptible to the parasite [8]. The transfer of sea lice infestation  
91 from farmed to wild salmonids is of great concern [9]. Therefore, control of lice is the first basic

92 priority for the industry, for further sustainable development. As a result, regulators in salmon  
 93 producing countries have enforced strict limitations to the allowed sea lice levels in a farm. These  
 94 regulations in turn impose treatments through different chemical, physical and biological methods  
 95 at frequent intervals and thus directly increase the control-related costs.

96 However, pesticide use is significantly reduced now-a-days due to widespread resistance to these  
 97 drugs and environmental pollution [10-12]. At the same time, increased frequency of treatment  
 98 methods and increased handling of the salmon by drug-free treatments to reduce the total lice load  
 99 in the salmon farms, has led to challenges with production cost, handling stress, injury, risk of  
 100 secondary infection, mortality and thus impaired fish welfare. This has increased the necessity to  
 101 develop new and alternative preventive measures [13, 14] which can document effect on lice, that  
 102 the fish welfare is maintained in a satisfactory manner and that integrated pest management plans  
 103 are being recognized [15, 16]. To address this, vaccination against salmon lice could be an important  
 104 alternative, since it is well-known that fish vaccines have greatly contributed to reducing the use of  
 105 drugs (especially antibiotics) against fish diseases, and have proven to be the most viable  
 106 preventative measure in fish farming in terms of bacterial and viral diseases. Similarly, a vaccine  
 107 against salmon lice may limit treatments against lice in sea-cages, thus improving the fish welfare  
 108 and cost effectiveness. Moreover, almost all farmed fish in Norway receives a mixture of vaccines  
 109 against viral and bacterial pathogens. Therefore, if vaccination is a successful treatment strategy,  
 110 limiting salmon lice can be achieved through vaccination, when applied along with other vaccines,  
 111 without any extra harm or additional stress to the fish.

112 Although *L. salmonis* has been an area of research for several decades [3, 5-6, 17, 18], understanding  
 113 the mechanisms behind the protection and development of prototype vaccines has been relatively  
 114 slow and is still in its infancy. Approaches so far used have met with little or no success due to  
 115 challenges in identification of protective antigens. Most strategies for sea lice vaccines have adopted

116 similar approaches used for vaccines against other ectoparasites in mammals, for example vaccines  
117 against ticks [29].

118 The present study utilized a vaccine antigen based on ribosomal protein P0 for its validation at the  
119 laboratory scale. The P0 protein, having a molecular mass between 34-38 kDa, is highly conserved  
120 among eukaryotes [20]. This vaccine P0 peptide antigen is located in a highly immunogenic region  
121 within the P0 protein, which coincides with areas of low sequence similarity between the lice P0  
122 protein and those of its salmon host, in order to avoid the induction of tolerance in the parasite or  
123 production of auto-antibodies in the salmon host. In addition, to increase its immunogenicity,  
124 promiscuous T-cell epitope (TCEs) from tetanus toxin and measles virus that are universally  
125 immunogenic in mammalian immune systems [21] and have been reported to improve vaccine  
126 efficacy in salmonids [22], was fused to the N-terminus of a 35 amino acids peptide from the  
127 ribosomal P0 protein of *L. salmonis* [23]. In our previous study, this chimeric fusion protein, (TT-P0)  
128 is shown to induce specific IgM response against pP0 compared to only synthetic pP0, in different  
129 teleost species including Atlantic salmon [23].

130 Therefore, in this study we hypothesized that the candidate vaccine TT-P0 will contribute to  
131 protection, either in terms of reduced lice count or reduced fecundity or both, with minimal  
132 secondary effects within the host. On the other hand, if protection is achieved, then i) at which stage  
133 of *L. salmonis* life cycle, ii) how is the systemic and local immunity modulated post vaccination and  
134 lice infestation and, iii) whether the candidate vaccine will have any impact on the subsequent  
135 parasite generation (F1). To address these questions, the efficacy of the vaccine candidate (TT-P0)  
136 was analysed by immunization of Atlantic salmon, followed by an experimental challenge with  
137 infective copepodids under controlled laboratory conditions. Three different parasite stages were  
138 analysed at different days post infestation (dpi). Moreover, to highlight the vaccine's further impact  
139 on F1 generation hatching efficiency, egg strings collected from the parasitized adult female lice

were hatched and compared. Simultaneously, host-lice interaction studies at the gene level were performed to explore the immune modulation in response to vaccination. All together, this study highlights preliminary documentation of TT-P0 as a potential and safe vaccine candidate for the control against salmon lice, *L. salmonis* at the lab scale.

## Results

### Vaccine efficacy post lice infestation

Three experimental groups were set: a control group received an intraperitoneal (ip) injection with PBS emulsified in Montanide™ ISA50 V2 adjuvant (Group 1); a second group received ip injection at a dose of 1 µg/gram body weight (gbw) of TT-P0 emulsified in adjuvant (Group 2); and a third group (Group 3) received ip injection at 1 µg/gbw of TT-P0 emulsified adjuvant plus bath immunization with TT-P0 as inclusion bodies (200 µg/L) for 1 hour immediately after ip injection. Immunization and challenge schedule were performed as outlined in Fig 1. Post infestation, lice from infected salmon were counted at 17, 28 and 50 dpi, corresponding to different developmental stages: chalimus, pre-adult (PA) and adult stage (Fig 2A). At 17 dpi, mean number of chalimus ( $\pm$  SD) attached per fish was 20.00 ( $\pm$  8.08), 25.17 ( $\pm$  10.02) and 23.70 ( $\pm$  12.41) for group 1, group 2 and group 3, respectively. No significant differences among groups were detected at 17 dpi. At 28 dpi, mean PA count per fish was 12.83 ( $\pm$  6.29), 12.73 ( $\pm$  5.13) and 17.77 ( $\pm$  7.28) for group 1, 2 and 3, respectively, where group 3 showed more PA per fish as compared to groups 1 and 2 ( $P < 0.01$ ). Finally, at 50 dpi, mean infection rate of adult lice per fish was reduced to 5.13 ( $\pm$  2.94), 4.06 ( $\pm$  2.53) and 5.50 ( $\pm$  2.63) for group 1, 2 and 3, respectively, and compared to group 1 control, group 2 showed an overall reduction tendency of 21 % (Table 1), although not significant. Moreover, development rates of *L. salmonis* throughout the experiment was nearly identical between the immunized and the control group (adjuvant only).

**Table 1: Effect of vaccination on salmon lice infestation following adult stage of lice.**

| Experimental groups | Fish number | Reduction of adult lice number | Reduction of adult females | Reduction of gravid females with eggs | Reduction of egg string length (mm) | Reduction in F1 copepodids |
|---------------------|-------------|--------------------------------|----------------------------|---------------------------------------|-------------------------------------|----------------------------|
| <b>Group 2</b>      | 30          | 21%                            | 40 % * ( $P < 0.02$ )      | 42% * ( $P < 0.03$ )                  | 5%                                  | 23%                        |
| <b>Group 3</b>      | 30          | -7%                            | 5%                         | 12%                                   | 6%* ( $P < 0.02$ )                  | 4%                         |

\*shows significant difference with respect to control group 1. Group 1 received ip injection of PBS + ISA50 V2 adjuvant; Group2 received ip injection of TT-P0 in ISA50 V2 adjuvant; Group 3 received ip injection of TT-P0 in ISA50 V2 adjuvant+ bath immunization with TT-P0 inclusion bodies

Although there were no great differences between the total lice counts per fish on the immunized and control fish regardless of louse life stages, statistically fewer adult female lice (40 % reduction), fewer number of female lice with eggs (42 % reduction) and total number of egg strings per fish were present on group 2 immunized fish compared to control. However, no differences were observed in group 3 compared to control (Figs 2 B, D, and E; Table 1). During the 50 dpi sampling, all egg strings were collected from the gravid females. Most of the gravid females had two egg strings and less numbers were found in group 2 compared to group 1 ( $P < 0.05$ ) (Fig 2F). No differences among the groups were observed in the female numbers with one egg string per fish (Fig 2G). Furthermore, gravid female lice removed from the immunized fish showed shorter egg string length compared to the control group, of which group 3 had significant reduction of 6 % ( $P < 0.05$ ) (Fig 2H; Table 1). The results mentioned above clearly showed reduced number of eggs produced by females in group 2 (42 % reduction,  $P < 0.03$ ) and thus supports significantly reduced fecundity in terms of reduced egg string data and less gravid females in group 2 ( Table 1). Overall, lice-induced damage on the parasitized fish was low and no wounds were visually observed on any of the experimental fish. Furthermore, there was no evidence of any secondary infections either on the surface or in internal organs of the infected fish.



186 **Hatching efficiency of F1 generation copepodids:** Post egg string measurement, a total of 50 egg  
187 strings from each experimental group were divided into 5 replicates (10 egg strings per replicate),  
188 for the F1 incubation experiment. Fig 2I shows the leftover egg strings (from the total egg strings  
189 collected from gravid females at 50 dpi), after the removal of 50 egg strings for the hatching  
190 experiment. During incubation, hatching of the egg strings were followed in each group to check if  
191 the reduced female fecundity of group 2 in F0 generation had any consequences in the early F1  
192 generation. Subsequently, the F1 copepodids were observed on day 8 and counted on day 10 post-  
193 incubation, and data were analyzed. At day 8, the hatching success of egg strings removed from lice  
194 on the immunized group were delayed and reduced, especially in group 2, compared to the control  
195 group (Fig 3A). This correlates well with the reduced fecundity in the F0 generation of group 2 gravid  
196 females. However, the counting at day 10 showed a reduction of 23 and 4 % infective copepodids  
197 in the vaccinated group 2 and 3, respectively (Fig 3B; Table 1). The percentage reduction of  
198 copepodids on day 10 was not high, as expected based on observation made on day 8 (Fig 3A). This  
199 was due to some unseen or technical problem occurring during the weekend, resulting in some  
200 unexpected mortality of the copepodids before counting on day 10. The experiment was not  
201 possible to repeat due to limited time and resources available.

202 Overall, the results from lice counting and analysis of different parameters at different lice stages  
203 post infestation, showed that the vaccine efficacy of group 2 was the best among the groups with  
204 an efficacy of 86 %. However, group 3 efficacy was negative compared to control since some of the  
205 parameters were lower than the control group (group 1). The terminology “vaccine efficacy” used  
206 here should not be interpreted as protection obtained. This is the overall vaccine effects based on  
207 different parameters studied, as described in the materials and methods section.

208 **Vaccination side effects**

209 Fish weight, length and condition factor (K) were analyzed at all sampling points. Despite that  
 210 immunized fish had less weight and length post lice challenge as compared to the control group (Fig  
 211 4A), the condition factor was acceptable (1.2) and it was the same for all the groups at different  
 212 sampling times (Fig 4A). For salmonids, K values usually fall in the range 0.8 to 2.0 [24].  
 213 Moreover, side effects of the TT-P0 vaccine having the Montanide ISA50 V2 adjuvant, were analyzed  
 214 using Speilberg and pigmentation scoring at 50 dpi. Speilberg scoring at 50 dpi showed that the  
 215 control group with only adjuvant had an average score of 2.0 compared to group 2 and 3, which  
 216 showed an average score of 2.8, i.e below 3, which is in an acceptable range (Fig 4B). On the other  
 217 hand, pigmentation score was significantly less in the immunized groups compared to the control  
 218 group, as shown in Fig 4B. Moreover, pigmentation was observed only on the epithelial lining and  
 219 not in muscle or tissue within the peritoneum. In most fish from group 2 and 3, the pigment spots  
 220 were extended to the anterior abdomen, which was related to the spread of vaccine pockets.  
 221 However, in the control group, pigmentation was localized near the injected region. Simultaneously,  
 222 individual fish checked for vaccine depots had vaccine residues, which were encapsulated by  
 223 connective tissue as small pockets. Fish from group 2 and 3 showed more spread of vaccine depots  
 224 within the peritoneal cavity compared to the control group. The injection site was checked for  
 225 redness and lesions and looked normal in all the fish.

#### 226 **Effect of vaccination combined with *L. salmonis* infestation on tissue specific gene expression**

227 Gene expression of pro-inflammatory mediators (TNF- $\alpha$ , IL-1 $\beta$ , IL-8); Th17 and regulatory mediators  
 228 (IL-22, IL-10); Th1 and Th2 mediators (IFN- $\gamma$ , IL-4/13A); immunoglobulin genes and cellular markers  
 229 (IgM, IgT, CD4, CD8 $\alpha$ ); and tissue remodeling gene matrix metalloprotease 9 (MMP9), were studied  
 230 to evaluate the response of vaccinated fish to salmon lice infestation at different stages of their life-  
 231 cycle, compared to control fish which received only adjuvant. Both anterior kidney and spleen, the

232 main immune organs in teleost fish, were used to evaluate systemic responses and skin was used to  
 233 evaluate the local immune response to salmon lice infestation.

234 **Global assessment: Heat map and hierarchical clustering.** To obtain an overview of the expression  
 235 profiles of the different groups tested at different sampling points corresponding to different lice  
 236 stages, heat map was constructed with hierarchical clustering. Hierarchical clustering of all the  
 237 genes studied, identified 3 clusters representing a differential clustered expression pattern with  
 238 respect to spleen tissue (Fig 5A). Hierarchical clustering of the experimental groups at different  
 239 sampling time points pre and post infestation (Fig 5B), also identified 3 clusters for all the tissues  
 240 studied, showing differences in gene expression under different lice infection stages and treatment  
 241 groups. Gene expression cluster comparison showed that the pro-inflammatory cytokines, T-  
 242 regulatory mediators, Th1 and Th2 mediators and T cell surface markers were strongly clustered. A  
 243 clear pattern of different upregulated gene clusters were visible in different tissues, showing highly  
 244 upregulated cluster of pro-inflammatory cytokines genes in spleen, highly upregulated regulatory  
 245 cytokine genes in head kidney and mixed upregulated gene expression of Th1, Th2, T reg, IgM and  
 246 IL-8 in skin. These results showed that, apart from lymphoid organs, local response played a major  
 247 role during the host-parasite interaction in later stages post infestation i.e 28 dpi in the vaccinated  
 248 groups (group 2 and 3). On the other hand, column-wise comparison based on different sampling  
 249 time-points, within respective groups, showed strong clusters with respect to substantial gene  
 250 upregulation at 28 dpi in vaccinated groups (group 2 and 3) in skin, at 17 and 50 dpi (group 3), and  
 251 28 dpi (group 2) in spleen and at 17 dpi (group 2 and 3) as well as 28 dpi (group 2) in head kidney.  
 252 Consequently, evaluating the two-way hierarchical clustering analysis for all the tissues, vaccinated  
 253 group 2 at 28 dpi showed the highest number of upregulated genes compared to the control group.  
 254 However, vaccinated group 3 showed higher number of upregulated genes at 17 dpi in spleen and

head kidney and at 28 dpi in skin. Heat map with two-way clustering of genes studied in the individual tissue is given in S1 Fig.

**Principal component analysis (PCA).** We performed exploratory data analyses using principal component analysis (PCA) in all the tissues studied. The PCA analysis of the expression profile of the 12 selected genes in skin samples at different time points post lice infestation (Fig 6) showed that samples taken at the early stages of infection [0 day challenge (69 d) and 17 dpi] in vaccinated and control groups were very similar and with low variability. Consecutive samples (28 and 50 dpi) displayed an increasing deviation along the principal component 1 (PC1) that contributed to most (78.5 %) of the observed variation. Samples taken at 28 and 50 dpi formed clearly distinct clusters, and variability among individual sampling points within groups increased with infection time. Moreover, 28 dpi in vaccinated group 2 contributes to maximum percentage variation (~43%) in PC1 (Fig 6A and C). All the 12 genes studied showed significant ( $P < 0.05$ ) contribution in PC1 (Fig 6C) and in addition, IgT expression showed significant contribution in PC2 where 50 dpi in group 3 had maximum contribution. This shows the important role of mucosal IgT expression in skin compared to lymphoid organs of bath vaccinated group. For head kidney and spleen, PC1 component contributed to 67.9 and 64.3 % variation, respectively at 17 and 28 dpi in both the vaccinated groups (S2 and S3 Figs). Similar to skin, in head kidney also 28 dpi in vaccinated group 2 contributes to maximum percentage variation (~37%) in PC1. On the contrary, in spleen 17 dpi vaccinated group 2 showed maximum contribution of ~34 % followed by 28 dpi from vaccinated group 2 (~19 %) (S2C and S3C Figs). All genes showed significant contribution in PC1 except for IL-10 and MMP9 in head kidney and CD8 $\alpha$  in spleen (S2D and S3D Figs). This shows that vaccination together with lice infestation has significant effect on the overall gene expression profile with more significant contribution at 28 dpi in group 2 than group 3.

278 **Detailed assessment by individual gene expression analysis.** The results from the overview of gene  
 279 expression profiles and the exploratory data analyses clearly showed changes related to different  
 280 sampling points post lice infestation and vaccination groups. Therefore, we proceeded to study  
 281 these changes in detail to further characterize gene expression levels. The overview of the relative  
 282 gene expression of all the genes analyzed in this study is graphically represented in S4 Fig. The gene  
 283 expression results in spleen (S4A Fig), showed that the pro-inflammatory cytokines TNF- $\alpha$ , IL-1 $\beta$  and  
 284 chemokine IL-8 were significantly up-regulated starting from pre-challenge (69 d) and this trend was  
 285 maintained until 50 dpi in the immunized groups (group 2 and 3) compared to the control (group 1).  
 286 The same results were obtained for metalloproteinase 9 (MMP-9) except at 28 dpi in spleen (S4A  
 287 Fig). For IL-1 $\beta$ , there was also significant expression in head kidney across all sampling time-points  
 288 except 17 dpi in both vaccinated groups. On the other hand, in skin IL-8 expression was up-regulated  
 289 only at 28 dpi in group 2 and at both 17 dpi and 28 dpi in group 3 (S4A Fig). However, IL-1 $\beta$  and  
 290 TNF- $\alpha$  in skin was downregulated in infected salmon at 50 dpi in group 2 and 3, respectively  
 291 compared to control group except at day 69 (pre-challenge), where TNF- $\alpha$  was significantly  
 292 upregulated in group 3.

293 The gene expression results also showed that both IgM and IgT transcript levels were significantly  
 294 upregulated in the TT-P0 vaccinated groups (group 2 and 3) compared to control (group 1) in all the  
 295 tissues and sampling time-points studied (S4B Fig) with exception of IgT in head kidney at 69 day  
 296 post vaccination and 17 dpi. Both genes followed almost similar pattern of expression in different  
 297 groups and sampling time-points, suggesting its important role in host-parasite interaction. IgT  
 298 transcription in skin was up-regulated earlier, at 69d (0 day infestation) in group 3, as a result of  
 299 immersion bath which is expected to stimulate mucosal immunity in a preferential way (S4B Fig).

300 On the other hand, the activation of T-cell related genes: CD4, CD8 $\alpha$ , IL-4/13A and IFN- $\gamma$  showed  
 301 significantly higher expression levels in the spleen at 50 dpi (S4B Fig). This trend was also seen at 28

302 dpi in the head kidney showing the activation of T-cell mediated immunity and the involvement of  
303 Th1/Th2 response. Significant decreasing trends of expression levels were also found in these genes  
304 at other sampling points showing different patterns of regulation depending on sampling time or  
305 experimental groups (S4B Fig). For example, cytotoxic T cell marker, CD8 $\alpha$  transcript was  
306 downregulated compared to the control group in most of the sampling points other than the time-  
307 points mentioned above.

308 In addition, T-cell mediated Th17 and regulatory cytokines, IL-22 and IL-10 shared a common trend  
309 of gene expression (S4B Fig) without any specific significant up-regulation except group 3 at 50 dpi  
310 in spleen. They were significantly downregulated in group 2 fish at 17 dpi in spleen and in head  
311 kidney at 28 dpi, whereas in group 3 fish at 28 dpi only in spleen.

## 312 Discussion

313 The importance of Atlantic salmon in aquaculture and its susceptibility to infection with *L. salmonis*  
314 has led researchers to investigate efficient non-medicinal, cost effective and eco-friendly measures  
315 to control the sea-lice load through the possibility of vaccine development. While development of  
316 a vaccine against *L. salmonis* is still on its way, developing a better understanding of host-pathogen  
317 interaction and its modulation in relation to vaccine candidate will provide a lead to further  
318 understand the vaccine efficacy. In the current study, we used a subunit vaccine based on the  
319 peptide of 35 amino acids from the ribosomal P0 protein of *L. salmonis* fused to the C-terminal of  
320 TCE's from tetanus toxin and measles virus positioned in tandem and previously tested for better  
321 antibody response [23]. Normally, housekeeping proteins are highly conserved among species and  
322 the development of a vaccine candidate based on housekeeping proteins such as P0 ribosomal  
323 protein is very challenging due to its high degree of identity between the P0 sequence of the  
324 vertebrate host and the ectoparasite. Consequently, the peptide P0 used as a vaccine candidate in  
325 this study was selected from the less conserved region between the *L. salmonis* and salmon [23].

Further, it have been shown in ticks that antibodies generated in rabbits against the tick P0 peptide do not recognize the P0 protein in a bovine cell line, showing the absence of cross-reactivity between the tick immunogenic peptide and the orthologous protein in the mammalian host [25]. Further examination of non-target effects would need investigation in phase I clinical trials if TT-P0 continues its development as an anti-salmon lice vaccine.

According to the sampling results in this study, initially an overall average of about 23 attached lice at the chalimus stage were recorded from each fish sampled at 17 dpi and by the end of the experiment, this figure lowered down to about 5 adult lice per fish. The total number of lice attached at a particular developmental stage post infestation did not vary statistically between the immunized or control groups of fish, although there was a tendency of reduction at the adult lice stage in vaccinated group 2 (TT-P0 ip injected group). However, significant impact on gravid female lice count and its reproductive efficacy with delayed hatching and reduced trend of copepodids count in F1 generation was documented also in group 2 (TT-P0 ip injected group) compared to only adjuvant injected group (group 1). This showed that the major effect of TT-P0 immunization was apparent in the adult female lice and its fecundity. A similar impact on female's *R. B. microplus* population was seen after challenge when a 20 aa P0 peptide derived from *Rhipicephalus* ticks conjugated to KLH was used to immunize cattle [25]. They reported decrease in female's yield and weight as well as decrease in egg mass and eggs hatched compared to only KLH injected group. Similar results have also been reported using sea lice whole extract or lice protein as a vaccine in Atlantic salmon, resulting in fewer oviparous female lice and lower fecundity [26, 27]. Based on the results, it was expected that a reduction in parasite fecundity due to vaccination will have an exponential reduction effect on the overall lice population and thus salmon lice load on the host at later generations, and consequently will warrant a reduction in chemical or drug free treatments to control lice.

350 Analogous to the overall efficacy calculated for the pP0 antigen against *R. B. microplus* ticks as well  
351 as other authors [29-30], we extrapolated a similar formula to our experiment for estimating vaccine  
352 efficacy by using the results obtained from lice count post infestation and other sampling results.  
353 Vaccinated group 2 obtained an overall vaccine efficacy of 86% whereas group 3 showed negative,  
354 thus exploring the potential effectiveness of TT-P0 vaccine candidate through ip method only and a  
355 negative impact of TT-P0 inclusion bodies immersion vaccination in conjunction with ip injection.  
356 However, further in-depth work has to be done. Thus, this method showed that a careful analysis  
357 of formulas similar to that used for ticks, to evaluate vaccine efficacy and its application against  
358 salmon lice, could improve the understanding of these vaccines and their mode of action in teleost.  
359 Moreover, lice count as a proxy for resistance had been questioned, since individual lice counts vary  
360 between trials and certain immune genes are affected negatively by increasing number of lice [31].  
361 Therefore, large number of experimental animals must be used in these types of immunization and  
362 infection trials and treatment efficacy parameters other than lice count should be considered.  
363 In Atlantic salmon, normally IgM transcripts are most abundant followed by IgT, especially in spleen  
364 and head kidney [32]. In the present study, the increase in relative expression level of IgM and IgT  
365 in spleen, head kidney and skin in vaccinated groups, indicated their important role in systemic and  
366 mucosal immune response in the context of copepodid infection. In agreement with these results,  
367 Tadiso et al. observed 10-fold increases in IgT expression in the skin from infected Atlantic salmon  
368 and up-regulation of IgT and IgM in spleen and skin two weeks post lice infection [32], but until now,  
369 IgM and IgT responses observed in Atlantic salmon have not been associated with protection against  
370 copepodid infection. The role of antibodies in protection against copepodid infection in teleost has  
371 not been fully explored and needs further understanding. For future studies, it will be of greater  
372 importance to measure antigen-specific IgM in serum and IgT in mucus by ELISA, to understand their  
373 role in the protection and crosstalk during salmon lice infection, post vaccination.



374 To understand the underlying immune mechanism, we assessed transcriptomic responses at  
 375 systemic and local level in immunized salmon focusing on mid and late response post infestation.  
 376 The results showed substantial increase in relative expression of pro-inflammatory mediators (IL-  
 377 1 $\beta$ , TNF- $\alpha$ , IL-8) at the systemic level (spleen and to some extent in head kidney). This is in line with  
 378 the sustained response of systemic pro-inflammatory cytokines seen in the more resistant species  
 379 such as the pink salmon throughout the infection and even after rejection in these fish [33]. Barker  
 380 et al. (2019) also obtained similar results with significantly higher levels of IL-1 $\beta$  expression at 17 dpi  
 381 with sea lice [34]. The same pattern of expression held true when investigating tissue repair enzyme  
 382 MMP 9 gene expression that was used as an indicator to evaluate the wound healing response of  
 383 the fish to sea lice infestation. The increase in MMP 9, had been suggested by several groups as a  
 384 possible mechanism for sea lice resistance in Atlantic salmon [31, 34, 35]. In addition, induced high  
 385 IL-8 transcript levels in skin and spleen post vaccination (69 d) has been implicated as an inducer of  
 386 neutrophil migration and antibody secreting cells locally. Furthermore, it can also be speculated that  
 387 elevated systemic expression of inflammatory and T regulatory mediators, pre and post lice  
 388 challenge in the vaccinated fish compared to only adjuvant control, might have been involved in  
 389 local expression of IgM and IgT transcript. Moreover, early upregulation of immunoglobulin like  
 390 genes in spleen, head kidney and skin, in addition to panels of immune genes, indicates a rapid  
 391 activation of the systemic as well as local anti-parasitic response to some extent, which is in  
 392 accordance with the results obtained by Skugor et al. (2008) [36]. This demonstrates a facilitated  
 393 cross talk between immune genes in vaccinated group pre and post infection.

394 On the other hand, the pro-inflammatory response in skin post infestation appeared to be at the  
 395 basal level compared to adjuvant control, except for IL-8, which was significantly upregulated at 17  
 396 dpi and 28 dpi of sampling for both vaccination types. It is possible that by the time systemic  
 397 inflammatory response was mounted, the cytokine expression had already returned to its basal level

in skin. Microarray experiment looking at the effects of early stage *L. salmonis* attachment showed that the local expression in skin decreased at early time points from 5 dpi, although the systemic response in the spleen remained throughout the study period [32]. As the earliest samples for gene expression in our study was taken at 17 dpi, it is possible that early transient increase of inflammatory cytokines in the skin was missed. Another possible explanation can be the sampling of skin from the standard area of the fish (near the dorsal fin and above the lateral line), regardless of louse attachment. Therefore, if the cutaneous inflammatory response is directed exclusively at the site of attachment, it would not have been targeted by the standardized skin sampling, especially if infection intensity was not as dramatic as those reported previously [32]. Matrix metalloprotease plays a role in the reconstruction process of the extracellular matrix during wound healing. In sea lice infected Atlantic salmon, the slow repair of extracellular matrix is in parallel with stable up-regulation of MMP9 and MMP13 at the damaged sites, and whose excessive activity may contribute to the development of chronic wounds [36]. Here, absence of MMP-9 stimulation in skin could suggest less damage to the host with no chronic wound and subsequently less tissue repair required. This was confirmed by no visible damages to the skin during the experiment.

Despite that, immersion bath stimulates immune response, mainly in mucosal tissues such as skin [37]. The intraperitoneal injection of TT-P0 plus immersion bath with inclusion bodies received by group 3 was ineffective in terms of vaccine efficacy, although some immune parameters were improved. On the other hand, responses to parasites have often been described in terms of Th1/Th2 dichotomy, but recent studies have shown that host-pathogen interactions are more complex. A T cell effector subset Th17, characterized by the production of IL-17 and IL-22, were identified along with signature cytokines for regulatory T cell subset (T reg), being inhibitory IL-10 and/or TGF- $\beta$ . Th1, Th2 and Th17 reciprocally regulates the development and function of each other, while Treg cells suppress all three subsets [32, 36, 38]. The regulatory cytokines control inflammation and thus

protect against immunopathology, but in doing so they reduce the effectiveness of immune mechanisms responsible for the expulsion of the parasites. Here, pro-inflammatory response in skin seemed to be regulated by IL-10, IL4 and IL-22 at 28 dpi of the immunized salmon. This is in accordance with the results obtained in resistant coho salmon (*Oncorhynchus kisutch*), although at an earlier time-point up to 72 hours [39]. We observed down regulation of IL-22 and IL-10 in spleen of salmon at chalimus stage of infection and an increase in IL-1 $\beta$ , TNF- $\alpha$  and IL-8 at subsequent pre-adult stage in group 2. In group 3, down regulation of IL-22 and IL-10 was seen in spleen at pre-adult stage of infection (28 dpi), which in turn is related to the increase observed in pro-inflammatory cytokines at adult stage (50 dpi). These differences in the regulation of inflammation could explain the differences found in the results between different vaccination methods i.e group 2 and group 3. This can be possibly a consequence of the *E. coli* proteins present in inclusion bodies of the bath vaccine given in group 3. Further studies targeting more immunological markers could clarify the mechanisms responsible for the differences between the two groups.

Previous studies have shown that the pathological effects of sea lice become especially profound for the host fish when they reach free-ranging stage (colloquially ‘mobile’) on the host compared to attached chalimus stage [40]. This explores the important strategy the host should develop to avoid damage on the skin through early free-ranging pre-adult lice interaction and develop resistance against it. The use of hierarchical clustering heat map and PCA analysis in this study showed a clear overview of the gene expression in different tissues across the groups at different time-points post infection and the way the genes were regulated by the host parasite interaction in the vaccinated and the non-vaccinated group. Most of the genes were highly to moderately upregulated at 28 dpi in only ip vaccinated, group 2, when the infestation was at the mobile stage (pre-adult), while they were upregulated to some extent in the ip plus bath vaccinated group 3 at both chalimus and pre-adult phase. In addition, in only ip vaccinated group 2, differential gene expression, cluster analysis

and principal component analysis also showed the dynamics of T-cell response as mixed Th1/Th2/T17/Treg at the pre-adult lice stage of infestation. This reflects the importance and potential of the gene modulation strategy of ip vaccinated group 2 compared to group 3 (both ip + bath vaccinated), against the early mobile lice stage, for effective TT-P0 vaccine efficacy at the later adult stage and that correlated well with the adult female lice count and fecundity data documented in the ip injected TT-P0 group.

Taken together, our result provided new insight into the potential and the effectiveness of the candidate vaccine against salmon lice and its effect on host-parasite interaction with minimal side-effects. The cumulative sampling results showed an overall vaccine efficacy of 86 % in the TT-P0 ip injected group (group 2) with an expected larger impact on F1 parasite generation by reduced re-infection loads via fewer females and decreased fecundity. In addition, the results revealed the priming of immune response post vaccination and pre-challenge, leading to simultaneous involvement of both systemic and local immunity during the salmon lice interaction for vaccinated fish, at the mobile lice stages. These findings provided valuable leads for potential effectiveness of the TT-P0 antigen as a good vaccine candidate against salmon lice (*L. salmonis*). However, long-term challenge trials and studies of re-infection post vaccination is necessary to fully understand and explore the protection capacity of TT-P0 candidate vaccine and underlying molecular mechanism of protection at the gene level. Another aspect to have in mind is that in experimental challenge conditions, the infestation load is usually very high (i.e in this validation study: 35 copepodids per fish) and is far higher compared to the natural conditions in the field. Consequently, the vaccine could be expected to work more effectively under lower infestation load. Therefore, performing a challenge experiment under field conditions will be the next step for further evaluation of TT-P0 vaccine efficacy in controlling salmon lice infestation.

## Materials and Methods

## 470 **Antigens**

471 TT-P0 protein was purified as described previously by Leal et al. 2019 [23]. Briefly, inclusion bodies  
472 were obtained by harvesting induced bacteria cells and centrifugation at 10,000 x g for 10 min at  
473 4°C. The cell pellets were resuspended in 300 mM NaCl, 10 mM Tris, pH 6 and were disrupted in  
474 French Press (Ohtake, Japan) at 1 200 kgf/cm<sup>2</sup>. The disrupted cell suspension was centrifuged at  
475 10,000 x g for 10 min at 4°C and the cell pellet containing the protein was resuspended in 1M NaCl,  
476 1% Triton X-100 using politron Ultra-Turrax T25, IKA WERKE and centrifuge again at 10,000 x g for  
477 10 min at 4°C. This step was repeated once again and purified inclusion bodies were suspended in  
478 PBS (16 mM Na<sub>2</sub>HPO<sub>4</sub>, 4 mM NaH<sub>2</sub>PO<sub>4</sub>, 120 mM NaCl, pH 7.4). Protein concentration was  
479 determined with a BCA protein assay kit (Pierce, USA) according to the manufacturer's instructions  
480 and by densitometry scanning of protein gels. Protein samples were checked by SDS-PAGE on 15%  
481 polyacrylamide gels and *western blotting* according previous work [23].

## 482 **Fish immunization and lice challenge**

483 The experiment was approved by the Norwegian Food Safety Authority  
484 (<https://www.mattilsynet.no/sok/?search=ID+14617>) and performed at the Aquaculture Research  
485 Station (Tromsø, Norway). Atlantic salmon (AquaGen standard, average weight 40 g at first  
486 vaccination), were kept in circular 500 L tanks supplied with recirculating fresh water for 2 weeks at  
487 an ambient temperature of approximately 10°C with 24h light (summer stimuli) for acclimation. Fish  
488 were fed with a commercial pellet diet (Nutra Olympic, Skretting). One hundred and twenty fish  
489 were placed in each tank, one tank per group and three experimental groups were settled. TT-P0  
490 was formulated in Montanide ISA50 V2 adjuvant (Seppic, France) at a ratio of 50/50. Formulations  
491 were made in a Politron (Ultra-Turrax T25, IKA WERKE, Germany).  
492 Immunization and challenge schedule are outlined in Fig 1. The fish were starved for one day before  
493 vaccination. Prior to vaccination, fish (average weight 44 g) were anaesthetized in 0.005%

494 benzocaine. First immunization was performed as follows: control group received 0.05 mL/fish by  
495 intraperitoneal (ip) injection with PBS emulsified in Montanide™ ISA50 V2 adjuvant (Group 1);  
496 second group received ip injection at a dose of 1 µg/gram body weight (gbw) of TT-P0 emulsified in  
497 adjuvant (Group 2); and third group (Group 3), received ip injection at 1 µg/gbw of TT-P0 emulsified  
498 adjuvant plus bath immunized with TT-P0 as inclusion bodies (200 µg/L) for 1 hour (120 fish in 200  
499 L aerated static bath), immediately after ip injection.

500 Fifteen days post immunization, fish were transferred to seawater. After 20 days in seawater (i.e 35  
501 days post first immunization), a booster dose of 0.1 mL was given to each fish (average weight ~60  
502 g) in a similar way as first vaccination and each experimental group was split in two tanks (Fig 1).  
503 Throughout the experiment, the following experimental conditions were maintained: Temperature:  
504 10°C; Light: 24 h; Oxygen level at outlet: ~80-90 %; Salinity: 34-35 ppt.

505 ***In vivo* lice challenge:** Sixty-nine days post first vaccination, 90 fish (average weight ~94 g) from each  
506 group were bath challenged with infective copepodids of *L. salmonis* (Oslo/Gulen strain from  
507 Norwegian Institute of Marine Research, IMR). The groups were bath challenged in separate tanks  
508 with reduced oxygenated water for one hour with stopped water supply. Each tank received approx.  
509 3150 copepodids to have an average distribution of about 35 copepodids/fish. Two days post  
510 challenge each group was distributed into triplicate tanks with 30 fish per tank. The parasitized fish  
511 were kept in seawater with a salinity of 34.5‰, oxygen level: 80/90 % and at a temperature of  
512 approximately 10 °C, until the salmon lice reached desired developmental stage i.e at matured adult  
513 stage when females have developed egg strings.

#### 514 **Sampling and lice counting**

515 To evaluate at which developmental life stage of lice the vaccine was effective, counting of lice on  
516 10 parasitized fish per tank i.e. 30 fish per group, were performed at 17 days post infestation (dpi)  
517 (chalmus), 28 dpi (pre-adult ) and 50 dpi at mature adult stage with first reproductive egg strings

(Fig 1). At 50 dpi i.e at the adult stage, both egg string number and egg string length per female were noted, for all the immunized groups and compared. Fish were given an overdose of anesthesia (0.01% benzocaine) before counting. To avoid counting error of detached lice due to anesthesia and handling, counting of chalimus at 17 dpi, pre-adults at 28 dpi and adults at 50 dpi on individual parasitized fish were performed under water in a white tray. All empty trays were checked for lice. At pre-challenge sampling points, fish were killed using 0.01% benzocaine prior to measurement of length and weight as well as collection of different tissues (skin, spleen and head kidney) for gene expression study. Further, spleen, head kidney and skin tissues were sampled aseptically from 18 fish per group (6 fish/tank). Tissue samples were immediately transferred to RNA later (Ambion) and kept at 4 °C overnight and then stored at -20°C. Overall sampling time-points as outlined in Fig 1 were at 0 (prior to 1<sup>st</sup> vaccination), 69 (31 days post booster) days post vaccination or 0 day challenge, and 17 (chalimus), 28 (pre-adult) and 50 (adult) dpi.

#### 530 **Incubation of collected egg strings for F1 generation hatching**

531 To analyze the effect of vaccine on F1 generation copepodids production, the first reproductive egg  
532 strings, obtained from gravid females at 50 dpi were incubated in well-aerated filtered seawater.  
533 This was to determine the effect, vaccine candidate had on hatching efficiency of the F1 generation  
534 copepodids. Fifty egg strings (sampled from the first reproductive event at 50 dpi) from each  
535 experimental group were incubated in 5 parallel aerated flow-through incubators (containing 500  
536 mL filtered seawater/incubator at ~10 °C) for 8 days, to study the hatching success to F1 generation  
537 copepodids. First visual observation was done on day eight post incubation and final counting was  
538 performed at day ten. Copepodid density was estimated by taking 10 mL water samples from each  
539 replicate and counting of copepodid was performed using dissecting microscope. This observation  
540 was repeated four times for each replicate.

#### 541 **Vaccine efficacy**

542 The overall efficacy of the candidate vaccine (in percentage) was calculated using lice count data  
543 collected from different dpi, including female lice fecundity parameters and F1 generation  
544 copepodid count compared to control group, using a similar approach as used to assess vaccine  
545 efficacy for candidate vaccines against ticks [23, 33]:

546 Vaccine efficacy (%) =  $100 \times [1 - (NCh \times NPA \times NF \times NM \times FE \times NE \times LE \times CC)]$

547 NCh: number of chalimus in vaccinated group/ number of chalimus in control group

548 NPA: number of pre-adults in vaccinated group/number of pre-adults in control group

549 NF: number of adult females in vaccinated group/number of adult females in control group

550 NM: number of males in vaccinated group/number of males in control group

551 FE: number of females with eggs in vaccinated group/number of females with eggs in control group

552 NE: number of egg strings in vaccinated group/number of egg strings in control group

553 LE: length of egg strings in vaccinated group/length of egg strings in control group

554 CC: F1 generation copepodids count from vaccinated group/F1 generation copepodids count in  
555 control group

## 556 **Vaccination side effects**

557 To check the side effects of the TT-P0 vaccine having the Montanide ISA50 as an adjuvant, the  
558 Speilberg scoring method was performed according to the criteria detailed by Midtlyng et al. 1996  
559 [41]. A separate score for pigmentation for each fish was assigned according to the table in Fig 4B.  
560 Fish weight and length were registered and the condition factor (K) was calculated according to  
561 Barnham and Baxter, 1998 [24].

## 562 **Gene expression studies**

563 All organs from the sampled fish, kept in RNA-later (Ambion, Austin, TX, USA) were subsequently  
564 processed for RNA isolation. Total RNA was extracted by MagMAX™-96 Total RNA Isolation Kit  
565 (Invitrogen), including turbo DNase treatment (Invitrogen) according to manufacturer's instruction.



566 Analysis of gene expression by Real-time PCR (QPCR) was performed in duplicates with a  
567 QuantStudio 5 Real-Time PCR System (Applied Biosystems) using SYBR Green (Applied Biosystems)  
568 in 384 well plates. For each mRNA, gene expression was normalized to the geometric mean of the  
569 3 house-keeping genes (EF-1a, 18S and  $\beta$ -actin) in each sample and fold change was calculated  
570 according to Pfaffl method [42] using the primer efficiency (E). Primer sequences used for gene  
571 expression studies are listed in Table 2.

572 **Table 2: Primer sequences used for the real-time PCR analysis. (\*) indicates reference genes**  
573 **used in this study for normalization.**

| GENE TARGET                                | NAME                               | ACCESSION No.    | FORWARD (5-3')                 | REVERSE (5-3')                     | AMPLI-<br>CON |
|--------------------------------------------|------------------------------------|------------------|--------------------------------|------------------------------------|---------------|
| Immuno-<br>globulin M<br>(secretory)       | <i>IgMs</i>                        | BT060420         | CTACAAGAGGGAGACCGGAG           | AGGGTCACCGTATTATCACTAGTTT          | 90            |
| Immuno-<br>globulin T                      | <i>IgT</i>                         | GQ907004         | CAACACTGACTGGAACAACAAGGT       | CGTCAGCGGTTCTGTTTGGGA              | 97            |
| Tumor<br>necrosis<br>factor alpha1         | <i>TNF<math>\alpha</math></i><br>1 | AY929385         | ACTGGCAACGATGCAGGACAA          | GCGGTAAGATTAGGATTGTATTCACCC<br>TCT | 144           |
| Interleukin 1<br>beta                      | <i>IL-1<math>\beta</math></i>      | AY617117         | GCTGGAGAGTGCTGTGGAAGAAC        | CGTAGACAGGTTCAAATGCACTTTGTG        | 220           |
| Interferon<br>gamma                        | <i>IFN-<math>\gamma</math></i>     | AY795563         | GATGGGCTGGATGACTTTAGGATG       | CCTCCGCTCACTGTCTCTCAA              | 166           |
| Interleukin-<br>4/13A                      | <i>IL-4/13</i><br>A                | EG837625         | CCACCACAAAATGCAAGGAGTTCT       | CCTGGTTGTCTTGGCTCTTAC              | 147           |
| Cluster of<br>Differentiation<br>n 4       | <i>CD4</i>                         | EU585750         | CGGAAGCGAGGGATATAAATGGT<br>G   | GGCATCATCACCCGCTGTCT               | 215           |
| Cluster of<br>Differentiation<br>n 8 alpha | <i>CD8<math>\alpha</math></i>      | AY693393         | GACAACAACAACCACCACGACTAC<br>AC | GCATCGTTTCGTTCTTATCCGGTT           | 211           |
| Matrix<br>metallo-<br>proteinase-9         | <i>MMP-9</i>                       | AGKD011088<br>65 | TGGAGAGAACTACTGGAGGCTGG<br>A   | CCGACAGAAGTAGATGTGGCCCTT           | 142           |
| Interleukin 8                              | <i>IL-8</i>                        | HM162835         | TCCTGACCATTACTGAGGGGATGA       | AGCGCTGACATCCAGACAAATCTC           | 200           |
| Interleukin<br>10                          | <i>IL-10</i>                       | EF165028         | CTGTTGGACGAAGGCATTCTAC         | GTGGTTGTTCTGCGTTCTGTTG             | 129           |
| Interleukin<br>22                          | <i>IL-22</i>                       | DW572073         | GGCCCGAGTCAGCAGAGACCT          | CTCCTCCATCCCGGCCAACTTC             | 106           |
| Beta actin*                                | <i><math>\beta</math>-actin</i>    | BT059604         | CAGCCCTCCTTCTCGGTAT            | CGTCACACTTCATGATGGAGTTG            | 72            |
| Elongation<br>factor 1- $\alpha$ *         | <i>EF1<math>\alpha</math></i>      | AF498320         | CAAGGATATCCGTCGTGGCA           | ACAGCGAAACGACCAAGAGG               | 327           |
| 18 S<br>ribosomal<br>RNA*                  | <i>18 S</i><br><i>rRNA</i>         | AJ427629         | TGTGCCGCTAGAGGTGAAATT          | CGAACCTCCGACTTTCGTTCT              | 101           |

574

## Statistical analysis

The results were analyzed and expressed as mean  $\pm$  standard deviation (SD) unless otherwise stated. Statistical analysis was performed and graphs were made using the Prism 6.01 software for Windows (GraphPad software, San Diego, CA, USA). Experimental groups were conducted in triplicates. Prior to data analysis, outliers were identified and removed from subsequent analyses. Normal distribution was assessed using D'Agostino & Pearson omnibus normality test. Multiple comparison were performed using analysis of variance (ANOVA) or Kruskal Wallis test depending on the normal distribution and equal variance of the data followed by Tukey or Dunn's Multiple Comparison *post hoc* tests. P-values < 0.05 were considered statistically significant. Two-way hierarchical clustering analysis heat map and dendrogram of relative gene expression data and experimental groups were generated in R language using ComplexHeatmap package by Gu, Z et al. 2016 [43]. In the Principal component analyses, "FactoMineR" package of the R statistical software (v3.6.2) was used to calculate the principal components and visualizations were constructed using "factoextra" package. Ellipses in the PCA graph are confidence ellipses with a confidence level of 0.95 and the centroids represent the center of the mass of the points per group.

## Acknowledgement

We would like to thank staffs at Aquaculture Research Station in Tromsø for assistance in fish maintenance, copepodid production, performing lice challenge and lice counting. We also thank Dr. Trilochan Swain for the valuable suggestions during the development of project concept and manuscript preparation.

## References

1. Food and Agriculture Organization of the United Nations (2016). The State of World Fisheries and Aquaculture 2016. Rome: Contributing to food security and nutrition for all.

2. Johnson SC, Treasurer JW, Bravo S, Nagasawa K, Kabata Z. A review of the impact of parasitic copepods on marine aquaculture. Zool. Stud. 2004; 43: 229–243.
3. Pike AW, Wadsworth SL. “Sealice on Salmonids: Their Biology and Control.” Advances in Parasitology. 1999; 44:233–337.
4. Ugelvik MS, Skorping A, Moberg O, Mennerat A. Evolution of virulence under intensive farming: salmon lice increase skin lesions and reduce host growth in salmon farms. J. Evol. Biol. 2017; 30(6):1136–42.
5. Costello MJ. “Ecology of Sea Lice Parasitic on Farmed and Wild Fish.” Trends in Parasitology. 2006; 22(10):475–83.
6. Tully O, Nolan DT. “A Review of the Population Biology and Host-parasite Interactions of the Sea Louse *Lepeophtheirus salmonis* (Copepoda : Caligidae).” Parasitology. 2002; 124:S165–S182.
7. Frazer LN, Morton A, Krkosek M. Critical thresholds in sea lice epidemics: evidence, sensitivity and subcritical estimation. Proc. Biol. Sci. 2012; 279: 1950–1958.
8. Fast MD. Fish immune responses to parasitic copepod (namely sea lice) infection. Dev. Comp. Immunol. 2014; 43:300–312.
9. Provan F, Jensen LB, Uleberg KE, Larssen E, Rajalahti T, Mullins J, et al. Proteomic analysis of epidermal mucus from sea lice–infected Atlantic salmon, *Salmo salar* L. J. Fish Dis. 2013; 36(3):311–21.
10. Lees F, Baillie M, Gettinby G, Revie CW. The Efficacy of Emamectin Benzoate against Infestations of *Lepeophtheirus salmonis* on Farmed Atlantic Salmon (*Salmo salar* L) in Scotland, 2002–2006. PLoS ONE 2008; 3, e1549. (doi:10.1371/journal.pone.0001549).

11. Jones PG, Hammell KL, Gettinby G, Revie CW. Detection of emamectin benzoate tolerance emergence in different life stages of sea lice, *Lepeophtheirus salmonis*, on farmed Atlantic salmon, *Salmo salar* L. J. Fish Dis. 2013; 36: 209–220.
12. Aaen SM, Helgesen KO, Bakke MJ, Kaur K, Horsberg TE. Drug resistance in sea lice: a threat to salmonid aquaculture. Trends Parasitol. 2015; 31: 72–81.
13. Igboeli OO, Burka JF, Fast MD. *Lepeophtheirus salmonis*: a persisting challenge for salmon aquaculture. Anim. Front. 2013; 4:22–32.
14. McNair CM. Ectoparasites of medical and veterinary importance: drug resistance and the need for alternative control methods. J. Pharm. Pharmacol. 2015; 67:351–363.
15. Liu Y, Bjelland HV. Estimating costs of sea lice control strategy in Norway. Prev. Vet. Med. 2014; 117: 469–477. (doi:10.1016/j.prevetmed.2014.08.018).
16. Brooks KM. Considerations in developing an integrated pest management programme for control of sea lice on farmed salmon in Pacific Canada. J. Fish Dis. 2009; 32:59–73. (doi:10.1111/j.1365-2761.2008.01013.x).
17. Johnson SC, Treasurer JW, Bravo S, Nagasawa K, Kabata Z. “A Review of the Impact of Parasitic Copepods on Marine Aquaculture.” Zool. Studies 2004; 43(2):229–43.
18. Boxaspen K. “A Review of the Biology and Genetics of Sea Lice.” ICES Journal of Marine Science 2006; 63(7):1304–16.
19. Raynard RS, Bricknell IR, Billingsley PF, Nisbet AJ, Vigneau A, Sommerville C. Development of vaccines against sea lice. Pest Management Science. 2002;58(6):569-75.
20. Goswami A, Chatterjee S, Sharma S. Cloning of a ribosomal phosphoprotein P0 gene homologue from *Plasmodium falciparum*, Mol. Biochem. Parasitol., 1996;82:117–120.

21. Panina-Bordignon P, Tan A, Termijtellen A, Demotz S, Corradin G, Lanzavecchia A. Universally immunogenic T cell epitopes: promiscuous binding to human MHC class II and promiscuous recognition by T cells. *Eur J Immunol* 1989; 19:2237–42.
22. Kuzyk MA, Burian J, Machander D, Dolhaine D, Cameron S, Thornton JC, Kay WW. An efficacious recombinant subunit vaccine against the salmonid rickettsial pathogen *Piscirickettsia salmonis*. *Vaccine* 2001; 19:2337-2344.
23. Leal Y, Velazquez J, Hernandez L, Swain JK, Rodríguez AR, Martínez R, et al. Promiscuous T cell epitopes boosts specific IgM immune response against a P0 peptide antigen from sea lice in different teleost species. *Fish. Shellfish Immunol.* 2019; 92:322-30.
24. Barnham Ch, Baxter A. Condition Factor, K, for Salmonid Fish. *Fisheries notes*. March 1998 FN0005, ISSN 1440-2254.
25. Rodríguez-Mallon A, Encinosa PE, Méndez-Pérez L, Bello Y, Rodríguez-Fernández R, Garay H, Cabrales A et al. High efficacy of a 20 amino acid peptide of the acidic ribosomal protein P0 against the cattle tick, *Rhipicephalus microplus*. *Ticks and Tick-borne Dis.* 2015; 6: 530-537.
26. Grayson TH, John RJ, Wadsworth S, Greaves K, Cox D, Roper J, et al. Immunization of Atlantic salmon against the salmon louse: identification of antigens and effects on louse fecundity. 1995;47(sA):85-94.
27. Contreras M, Karlsen M, Villar M, Olsen RH, Leknes, LM et al. Vaccination with Ectoparasite Proteins Involved in Midgut Function and Blood Digestion Reduces Salmon Louse Infestations. *Vaccines*, 2020; 8: 32. Doi:10.3390/vaccines8010032.
28. de la Fuente J, Rodriguez M, Montero C, Redondo M, Garcia-Garcia JC, Mendez L et al. Vaccination against ticks (*Boophilus spp.*): the experience with the Bm86-based vaccine Gavac. *Genet. Anal.* 1999; 15:143–148.

29. Hajdusek O, Almazan C, Loosova G, Villar M, Canales M, Grubhoffer L et al. Characterization of ferritin 2 for the control of tick infestations. *Vaccine* 2010; 28:2993–2998.
30. Almazan C, Kocan KM, Bergman DK, Garcia-Garcia JC, Blouin EF, de la Fuente J. Identification of protective antigens for the control of *Ixodes scapularis* infestations using cDNA expression library immunization. *Vaccine*. 2003; 21:1492–1501.
31. Holm H, Santi N, Kjoglum S, Perisic N, Skugor S, Evensen O. Difference in skin immune responses to infection with salmon louse (*Lepeophtheirus salmonis*) in Atlantic salmon (*Salmo salar* L.) of families selected for resistance and susceptibility. *Fish Shellfish Immunol*. 2015;42(2):384–94.
32. Tadiso TM, Krasnov A, Skugor S, Afanasyev S, Hordvik I, Nilsen F. Gene expression analyses of immune responses in Atlantic salmon during early stages of infection by salmon louse (*Lepeophtheirus salmonis*) revealed biphasic responses coinciding with the copepod-chalimus transition. *BMC Genomics*. 2001; 12: 141.
33. Jones SRM, Fast MD, Johnson SC, Groman DB. Differential rejection of salmon lice by pink and chum salmon: disease consequences and expression of proinflammatory genes. *Dis. Aquatic Org*. 2007; 75:229–238.
34. Barker SE, Bricknell IR, Covello J, Purcell S, Fast MD, Wolters W, et al. Sea lice, *Lepeophtheirus salmonis* (Krøyer 1837), infected Atlantic salmon (*Salmo salar* L.) are more susceptible to infectious salmon anemia virus. *PLOS ONE*. 2019;14(1): e0209178.
35. Skugor S, Holm HJ, Bjelland AK, Pino J, Evensen O, Krasnov A, et al. Nutrigenomic effects of glucosinolates on liver, muscle and distal kidney in parasitefree and salmon louse infected Atlantic salmon. *Parasites & Vectors*. 2016; 9.

36. Skugor S, Glover KA, Nilsen F, Krasnov A. Local and systemic gene expression responses of Atlantic salmon (*Salmo salar* L.) to infection with the salmon louse (*Lepeophtheirus salmonis*). BMC Genomics. 2008;9:18.
37. Mweemba Munang'andu H, Mutoloki S, Evensen O. A review of the immunological mechanisms following mucosal vaccination of finfish. Front. Immunol. 2015; 6:427. doi: 10.3389/fimmu.2015.00427.
38. Belkaid Y, Blank RB, Suffia I. Natural regulatory T cells and parasites: a common quest for host homeostasis. Immunol. Rev. 2006;212:287-300.
39. Braden LM, Koop BF, Jones SR. Signatures of resistance to *Lepeophtheirus salmonis* include a TH2-type response at the louse-salmon interface. Dev. Comp. Immunol. 2015; 48(1):178-91. <https://doi.org/10.1016/j.dci.2014.09.015>
40. Revie C, Dill L, Finstad B, Todd CD. Sea Lice Working Group Report. NINA Special Report 2009; 39: 1– 17.
41. Midtlyng PJ, Reitan LJ, Speilberg L. Experimental studies on the efficacy and side-effects of intraperitoneal vaccination of Atlantic salmon (*Salmo salar* L.) against furunculosis. Fish Shellfish Immunol. 1996; 6:335-350.
42. Pfaffl MVA. New mathematical model for relative quantification in real-time RT-PCR. Nucleic Acids Res. 2001; 29, e45.
43. Gu Z, Eils R, Schlesner M. Complex heatmaps reveal patterns and correlations in multidimensional genomic data. Bioinformatics 2016; 32(18):2847-2849.

## Figure Captions

**Fig 1. Experimental Outline.** Experimental design depicting immunization, challenge, post challenge schedule along with sampling time-points and experimental group details.

711 **Fig 2. Efficacy of TT-P0 vaccine on lice counts and fecundity of adult female lice post infestation.**

712 (A) Bar graph showing average lice count / fish for different immunized groups at different lice  
713 stages post infestation (dpi): chalimus (17 dpi), pre-adult (28 dpi) and adults (50 dpi).

714 Adult lice on the experimental fish were sampled at 50 days post infestation (dpi). The sampled lice  
715 were counted for total number of males, females and female's fecundity parameters per fish. Data  
716 showing, (B) Female numbers, (C) Male numbers, (D) Females with eggs, (E) Number of egg strings  
717 per fish, (F) Females with two egg strings, (G) Females with one egg string, (H) Egg string length, for  
718 different groups per fish (n=30) at 50 dpi. Data shown as mean + SD. A Mann-Whitney test was  
719 performed due to unequal variances to compare vaccinated groups (Group 2 or 3) with control  
720 (Group 1). Asterisk indicates statistically significant differences compared to control group (\* $P < 0.05$ ,  
721 \*\*  $P < 0.01$ ). (I) Photograph of leftover egg strings (after removal of 50 egg strings for F1 generation  
722 hatching experiment) to represent the visual number of total egg strings in different groups. Group  
723 details: Group 1 received ip injection of PBS + ISA50 V2 adjuvant; Group2 received ip injection of TT-  
724 P0 in ISA50 V2 adjuvant; Group 3 received ip injection of TT-P0 in ISA50 V2 adjuvant+ bath  
725 immunization with TT-P0 inclusion bodies.

726 **Fig 3. TT-P0 vaccine's effects on F1 generation hatching and copepodid number.**

727 (A) Observation noted on day 8 for hatching efficiency and visual health status of the hatched  
728 copepodids and (B) Total number of copepodids counted on day 10 post incubation of egg strings.  
729 The bar shows the mean value + SD in 5 replicate tanks for each experimental group. Group details:  
730 Group 1 received ip injection of PBS + ISA50 V2 adjuvant; Group2 received ip injection of TT-P0 in  
731 ISA50 V2 adjuvant; Group 3 received ip injection of TT-P0 in ISA50 V2 adjuvant+ bath immunization  
732 with TT-P0 inclusion bodies.

733 **Fig 4. Side effects of TT-P0 vaccine post immunization.**



734 (A) Growth (weight and length) and condition factor of the fish post immunization and challenge at  
 735 different sampling points: Pre-immunization (0 d), 69d post immunization (69 d) and at different  
 736 days post infestation (dpi) based on the different lice stages during infection: 17 dpi (chalimus), 28  
 737 dpi (pre-adult) and 50 dpi (adult). (B) Visual scoring and analysis of the vaccine side effects resulting  
 738 in adhesion (left panel) and pigmentation (right panel) near the vaccination site. Data are shown as  
 739 the mean + SD of the parameters under analysis (n = 30). Based on normal distribution test, one-  
 740 way ANOVA or Kruskal Wallis test was done followed by Tukey or Dunn's Multiple Comparison.  
 741 Asterisk (\*) indicates statistical difference \*( $P < 0.05$ ), \*\*( $P < 0.01$ ), \*\*\*( $P < 0.001$ ) between the groups  
 742 with respect to control (Group1). Group details: Group 1 received ip injection of PBS + ISA50 V2  
 743 adjuvant; Group2 received ip injection of TT-P0 in ISA50 V2 adjuvant; Group 3 received ip injection  
 744 of TT-P0 in ISA50 V2 adjuvant+ bath immunization with TT-P0 inclusion bodies.

745 **Fig 5. Hierarchical clustering analysis heat map and dendrogram of relative gene expression data**  
 746 **over different sampling time points pre and post infection within the vaccinated groups, and for**  
 747 **three different tissues.** (A) indicates the pattern of gene expression across different groups and  
 748 tissues. It also shows one-way clustering of differentially expressed genes on the right with respect  
 749 to spleen whereas (B) shows two way hierarchical clustering of genes on the right and group wise  
 750 sampling time-points on the top. Differential gene expression is represented for all genes as a colour  
 751 gradient across all sampling points within different groups from brick red (lowest) to black (highest)  
 752 for spleen, green (lowest) to dark orange (highest) for head kidney, blue (lowest) to red (highest)  
 753 for skin. Group details: Group 1 received ip injection of PBS + ISA50 V2 adjuvant; Group2 received  
 754 ip injection of TT-P0 in ISA50 V2 adjuvant; Group 3 received ip injection of TT-P0 in ISA50 V2  
 755 adjuvant+ bath immunization with TT-P0 inclusion bodies.

756 **Fig 6. PCA analysis of skin samples pre and post lice challenge.** PCA analysis for the *in vivo* challenge  
 757 samples representing the distribution of lice infested host skin samples in vaccinated (group 2 and

3) and only adjuvant vaccinated (group 1) groups at 0, 17, 28 and 50 dpi (A and B). Analysis was based on mean fold-changes of all genes for each individual sample at each sampling point (smaller symbols) relative to the unvaccinated control. The ellipses indicate the group dispersion/variability from the centroid (larger symbols) calculated using all individual fold-changes values/group (A). (C) shows the contribution of sampling points to different components. (D) shows the contribution of genes on different components and the significant genes contributing in principal component 1 and 2.

## Supporting information

**S1 Fig. Two-way hierarchical clustering heat map for each tissue.** The rows represent gene expression and the column represents different sampling points within respective groups. Group details: Group 1 received ip injection of PBS + ISA50 V2 adjuvant; Group2 received ip injection of TT-P0 in ISA50 V2 adjuvant; Group 3 received ip injection of TT-P0 in ISA50 V2 adjuvant + bath immunization with TT-P0 inclusion bodies.

**S2 Fig. PCA analysis of head kidney samples post immunization and lice infestation.** PCA analysis of head kidney samples from vaccinated (group 2 and 3) and only adjuvant vaccinated (group 1) groups at 0, 17, 28 and 50 dpi (A and B). Analysis was based on mean fold-changes of all genes for each individual sample at each sampling point (smaller symbols) relative to the unvaccinated control. The ellipses indicate the group dispersion/variability from the centroid (larger symbols) calculated using all individual fold-changes values/group (A). (C) shows the contribution of sampling points to different components. (D) shows the contribution of genes on different components and the significant genes contributing in principal component 1 and 2.

**S3 Fig. PCA analysis of spleen samples post immunization and lice infestation.** PCA analysis of spleen samples from vaccinated (group 2 and 3) and only adjuvant vaccinated (group 1) groups at 0, 17, 28 and 50 dpi (A and B). Analysis was based on mean fold-changes of all genes for each

individual sample at each sampling point (smaller symbols) relative to the unvaccinated control. The ellipses indicate the group dispersion/variability from the centroid (larger symbols) calculated using all individual fold-changes values/group (A). (C) shows the contribution of sampling points to different components. (D) shows the contribution of genes on different components and the significant genes contributing in principal component 1 and 2.

#### **S4 Fig. Transcriptional analysis of immune genes post immunization and lice infection.**

Transcript levels of the pro-inflammatory cytokines (A) and immune genes (B) in spleen, head kidney and skin at different sampling points: 69 days from first vaccination (69d) or zero day challenge and after challenge (dpi: days post infestation), were analysed by real-time QPCR. The QPCR data were normalized to the geometric mean of the 3 house-keeping genes (EF-1a, 18S and  $\beta$ -actin) and expression is relative to the pre-immunized level. Fold change was calculated using the primer efficiency. Data shown represent the mean  $\pm$  SD of experiments performed in triplicate, n=18 fish/group (6 fish/replicate). Statistical analysis was carried out using one-way ANOVA or Kruskal Wallis test followed by Tukey or Dunn's Multiple Comparison compared to control group (\*P < 0.05, \*\*P < 0.01, \*\*\*P < 0.001). Group details: Group 1 received ip injection of PBS + ISA50 V2 adjuvant; Group2 received ip injection of TT-P0 in ISA50 V2 adjuvant; Group 3 received ip injection of TT-P0 in ISA50 V2 adjuvant+ bath immunization with TT-P0 inclusion bodies.

### Experimental groups

Group 1 (G1) = PBS – Montanide ISA50 V2 adjuvant

Group 2 (G2) = TT-P0 antigen (1  $\mu\text{g/g}$  body weight) - Montanide ISA50 V2 adjuvant

Group 3 (G3) = TT-P0 antigen (1  $\mu\text{g/g}$  body weight) - Montanide ISA50 V2 adjuvant

### Modes for the application of vaccines

G1 and G2: Intraperitoneal Injection

G3: Intraperitoneal Injection + immersion bath

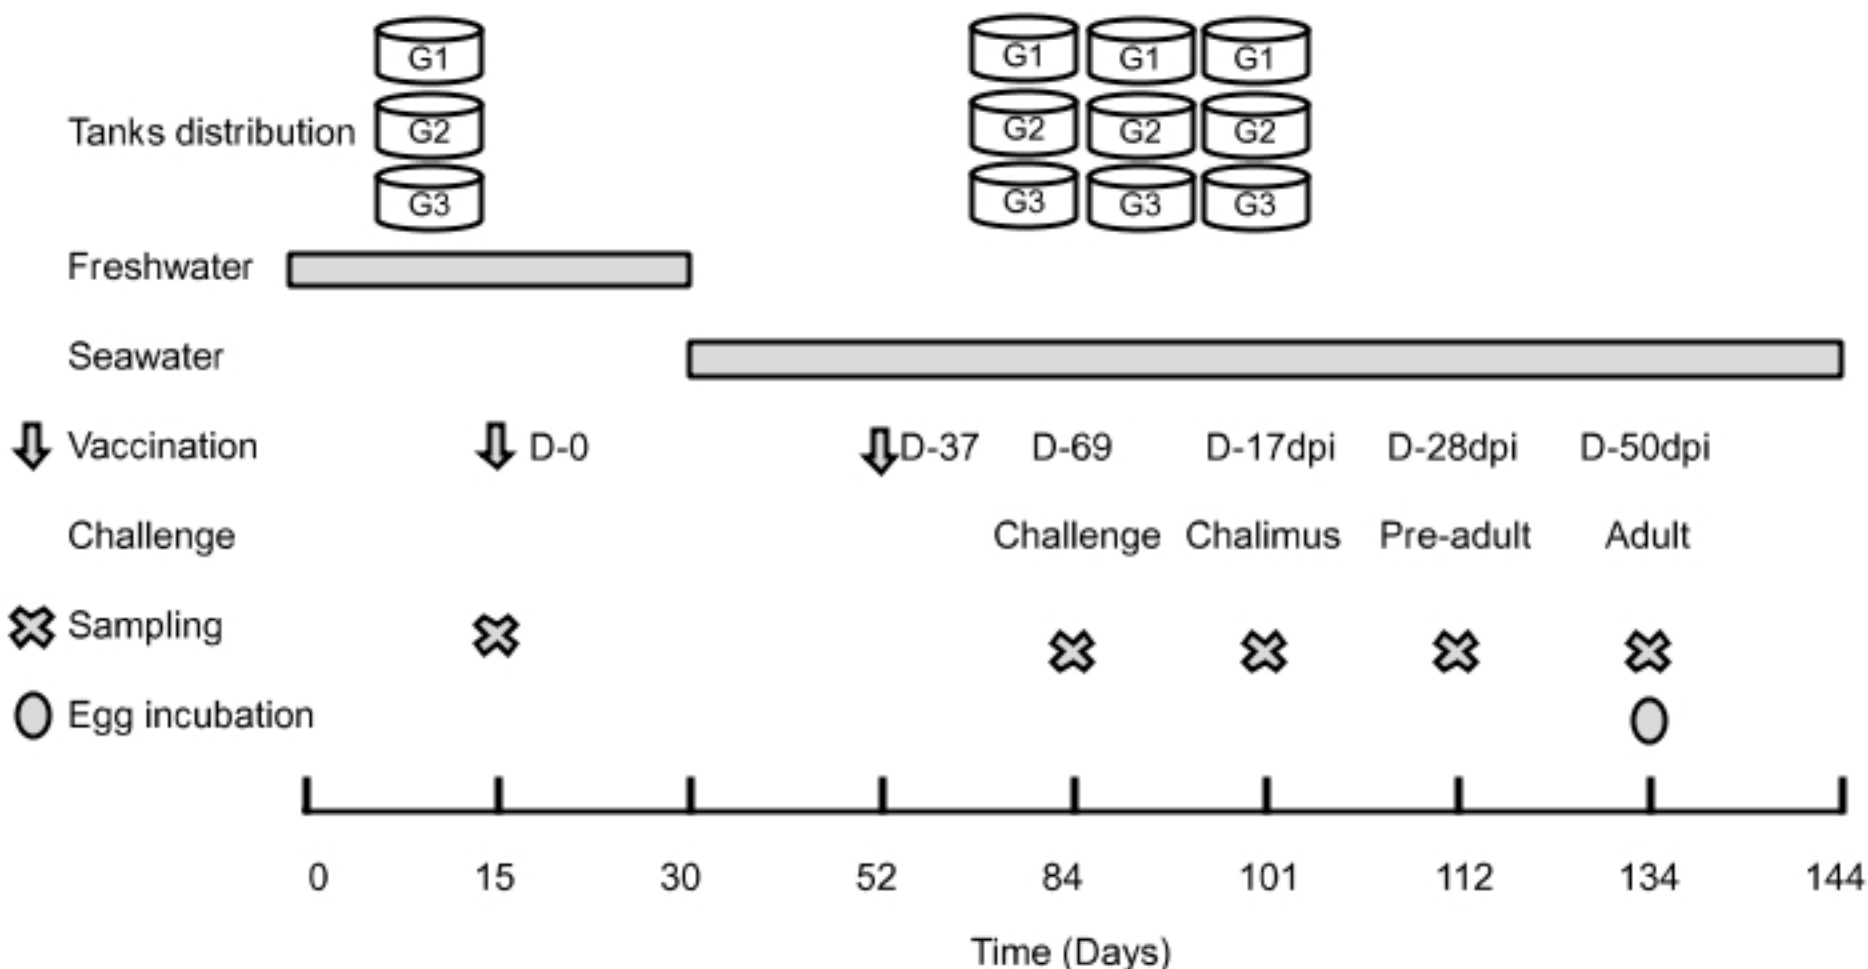

Figure 1

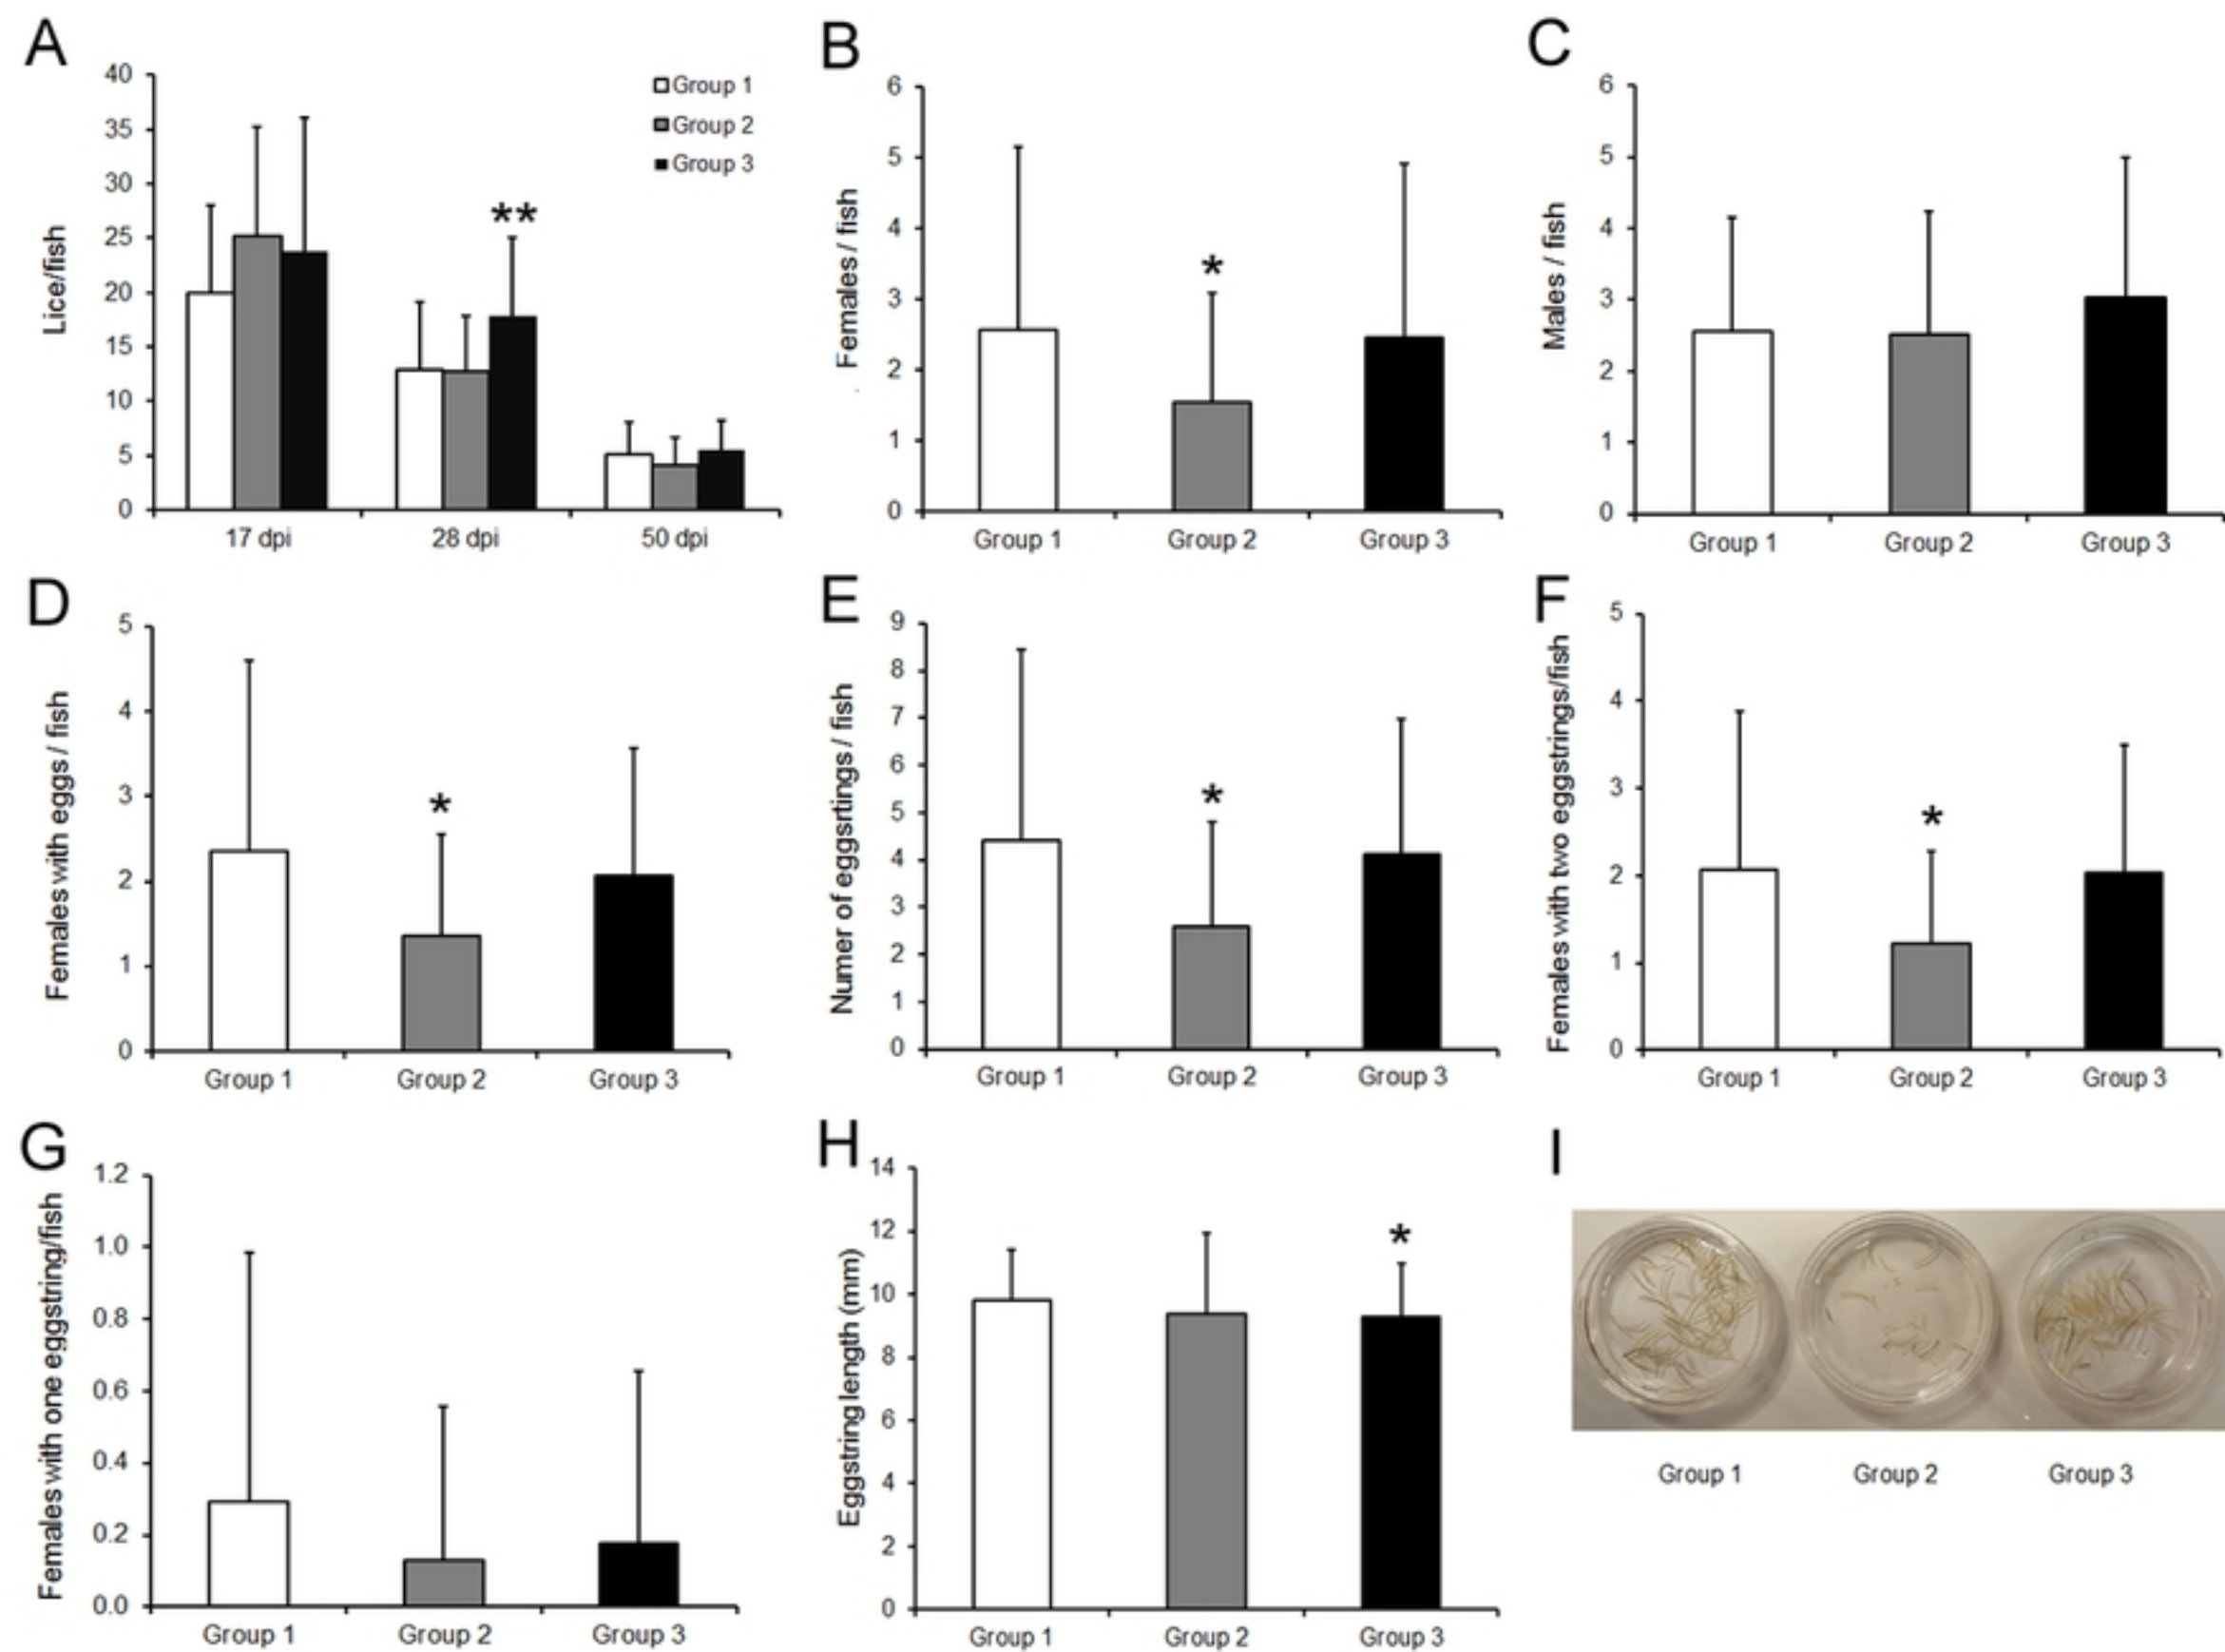

Figure 2

A

| Incubator number/<br>Group number | Observations                                                                     |
|-----------------------------------|----------------------------------------------------------------------------------|
| I1-G1                             | Less copepodids number in the water column and some at the tank bottom           |
| I2-G1                             | Good number in the water column and bottom                                       |
| I3-G1                             | Good number in the water column and bottom                                       |
| I4-G1                             | Good number in the water column and bottom                                       |
| I5-G1                             | Good number in the water column and bottom                                       |
| I6-G2                             | Less number of copepodids at the bottom                                          |
| I7-G2                             | Less on the bottom and in the water column. Half of an egg string still to hatch |
| I8-G2                             | Less on the bottom and in the water column. One egg string still to hatch        |
| I9-G2                             | Less numbers at the bottom. Nothing visually observed in the water column        |
| I10-G2                            | Less numbers on the bottom. Nothing visually observed in the water column        |
| I11-G3                            | Many in the water column. Less numbers at the bottom                             |
| I12-G3                            | Many in the water column. Less numbers at the bottom                             |
| I13-G3                            | Few in the water column. Less numbers at the bottom                              |
| I14-G3                            | Less numbers in the water column and bottom                                      |
| I15-G3                            | Less numbers in the water column and bottom                                      |

B

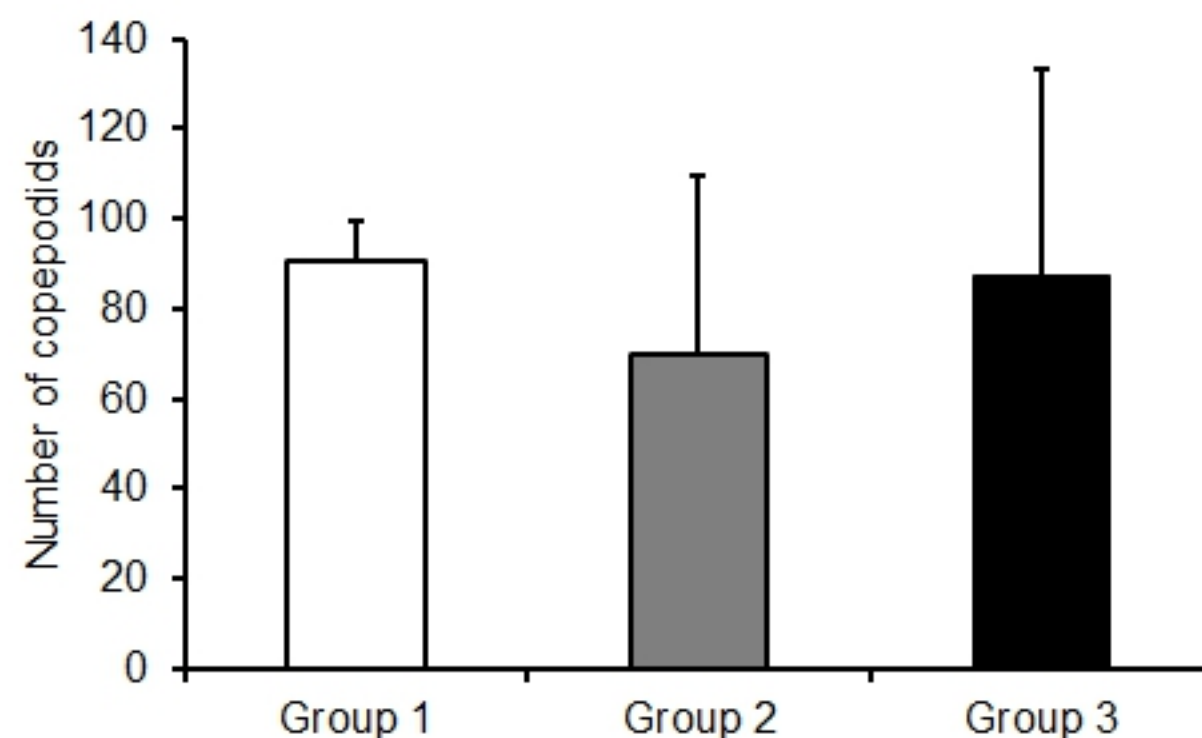

Figure 3

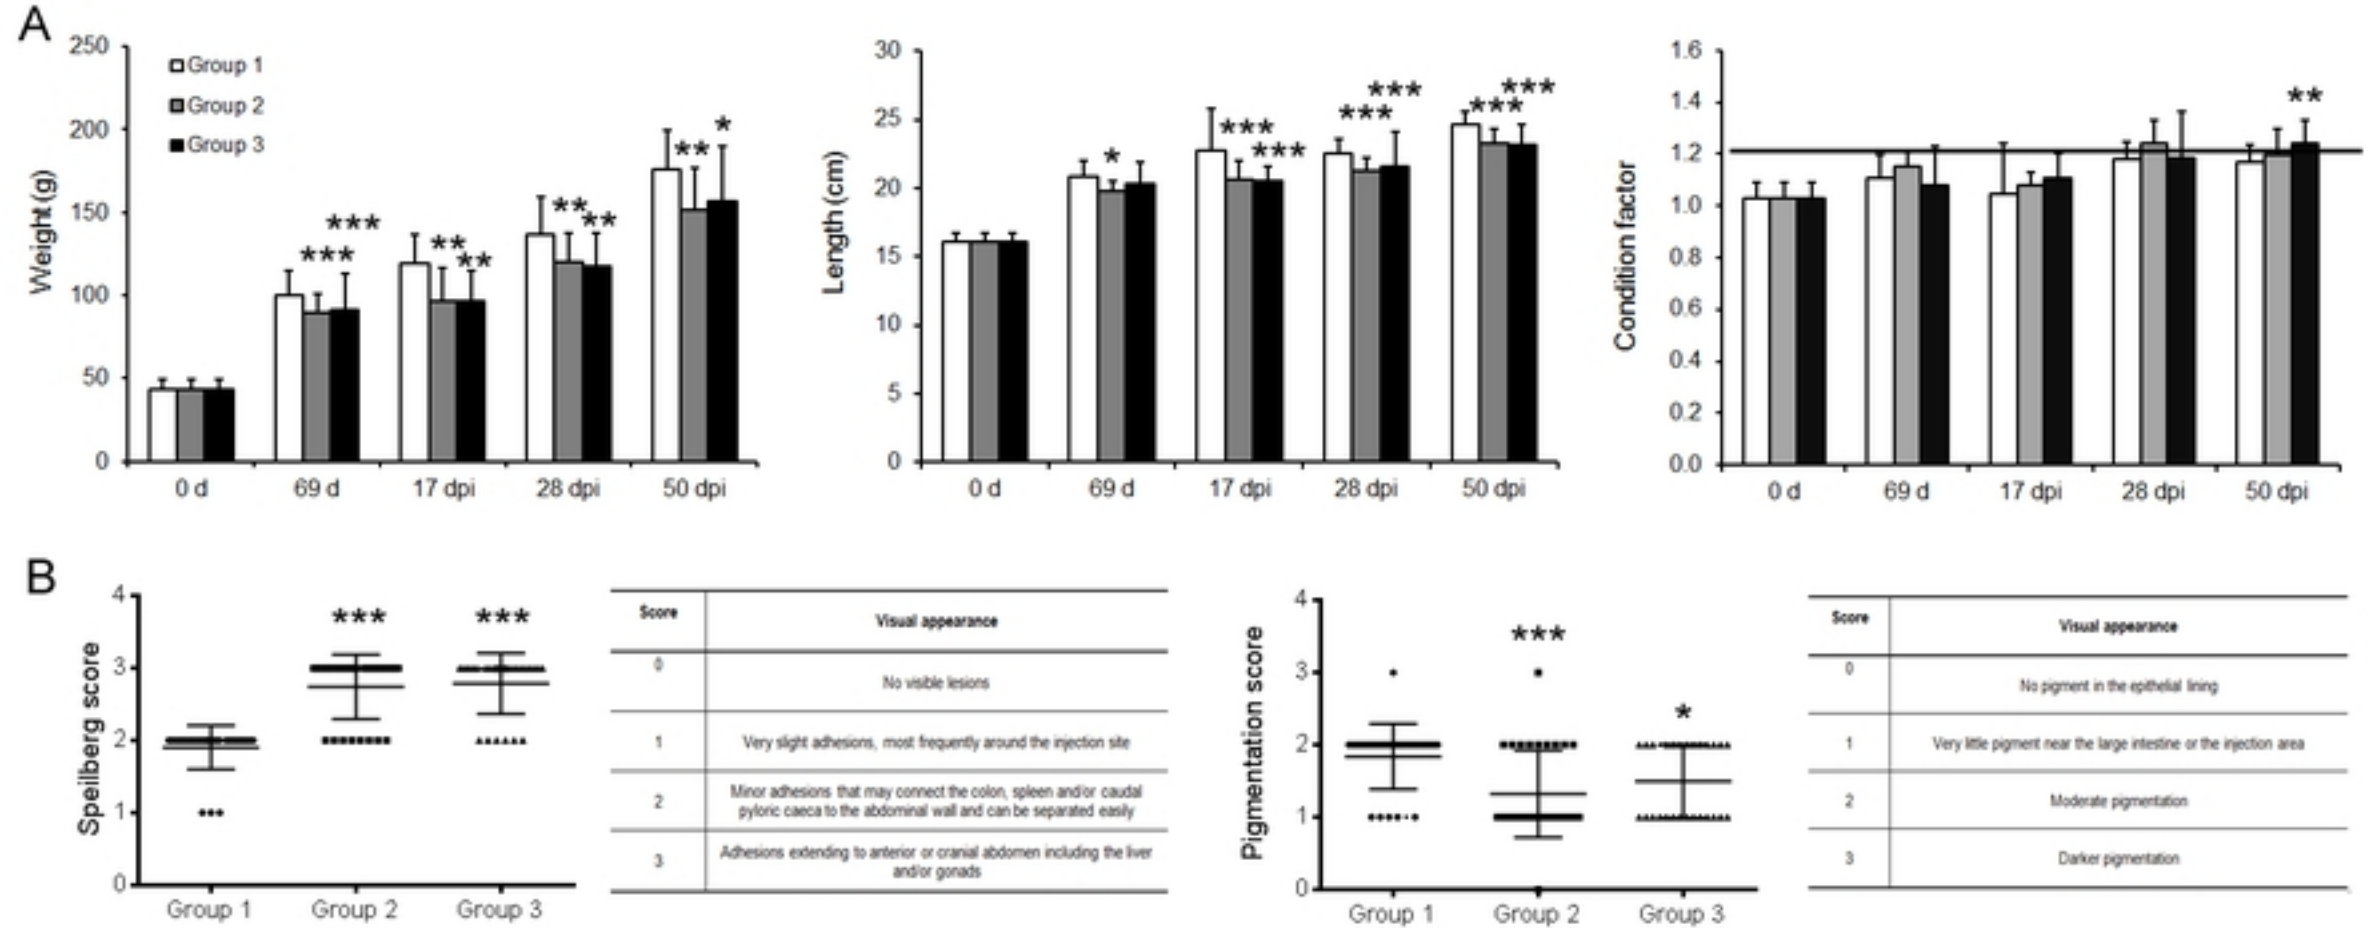

Figure 4



A

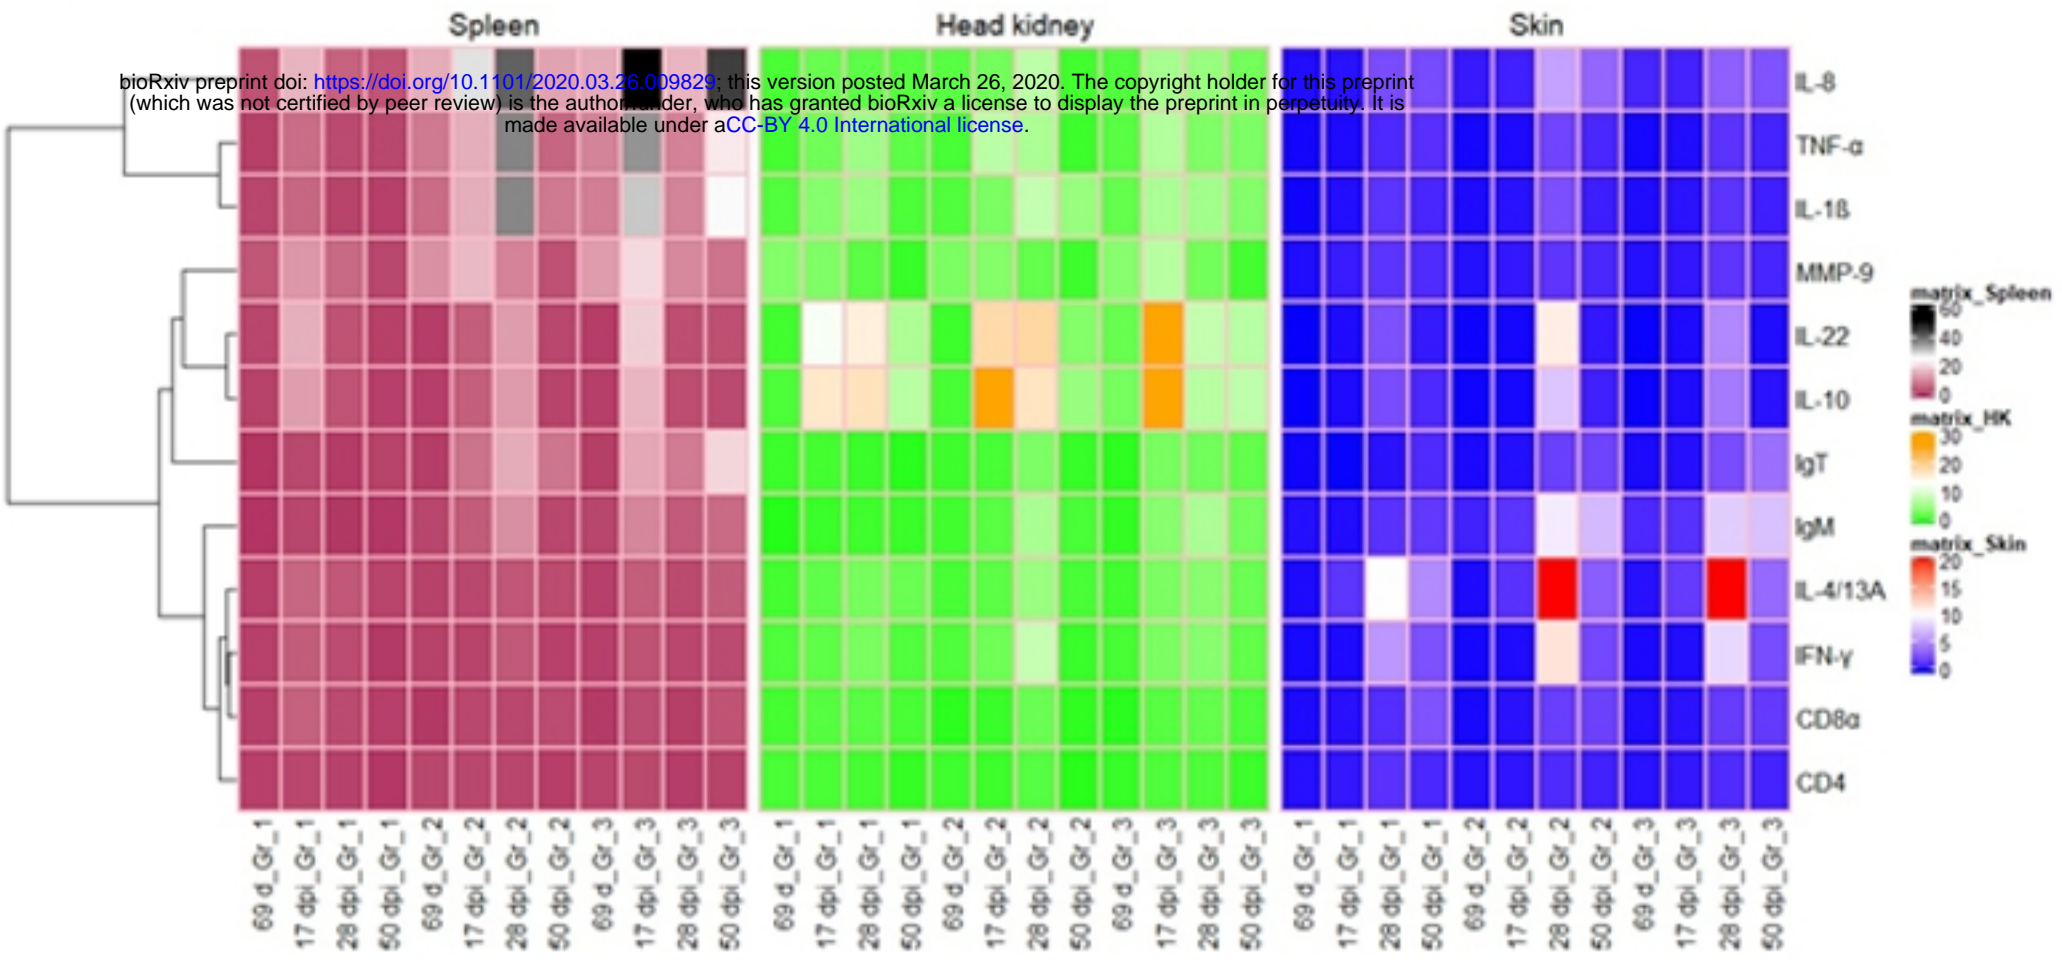

B

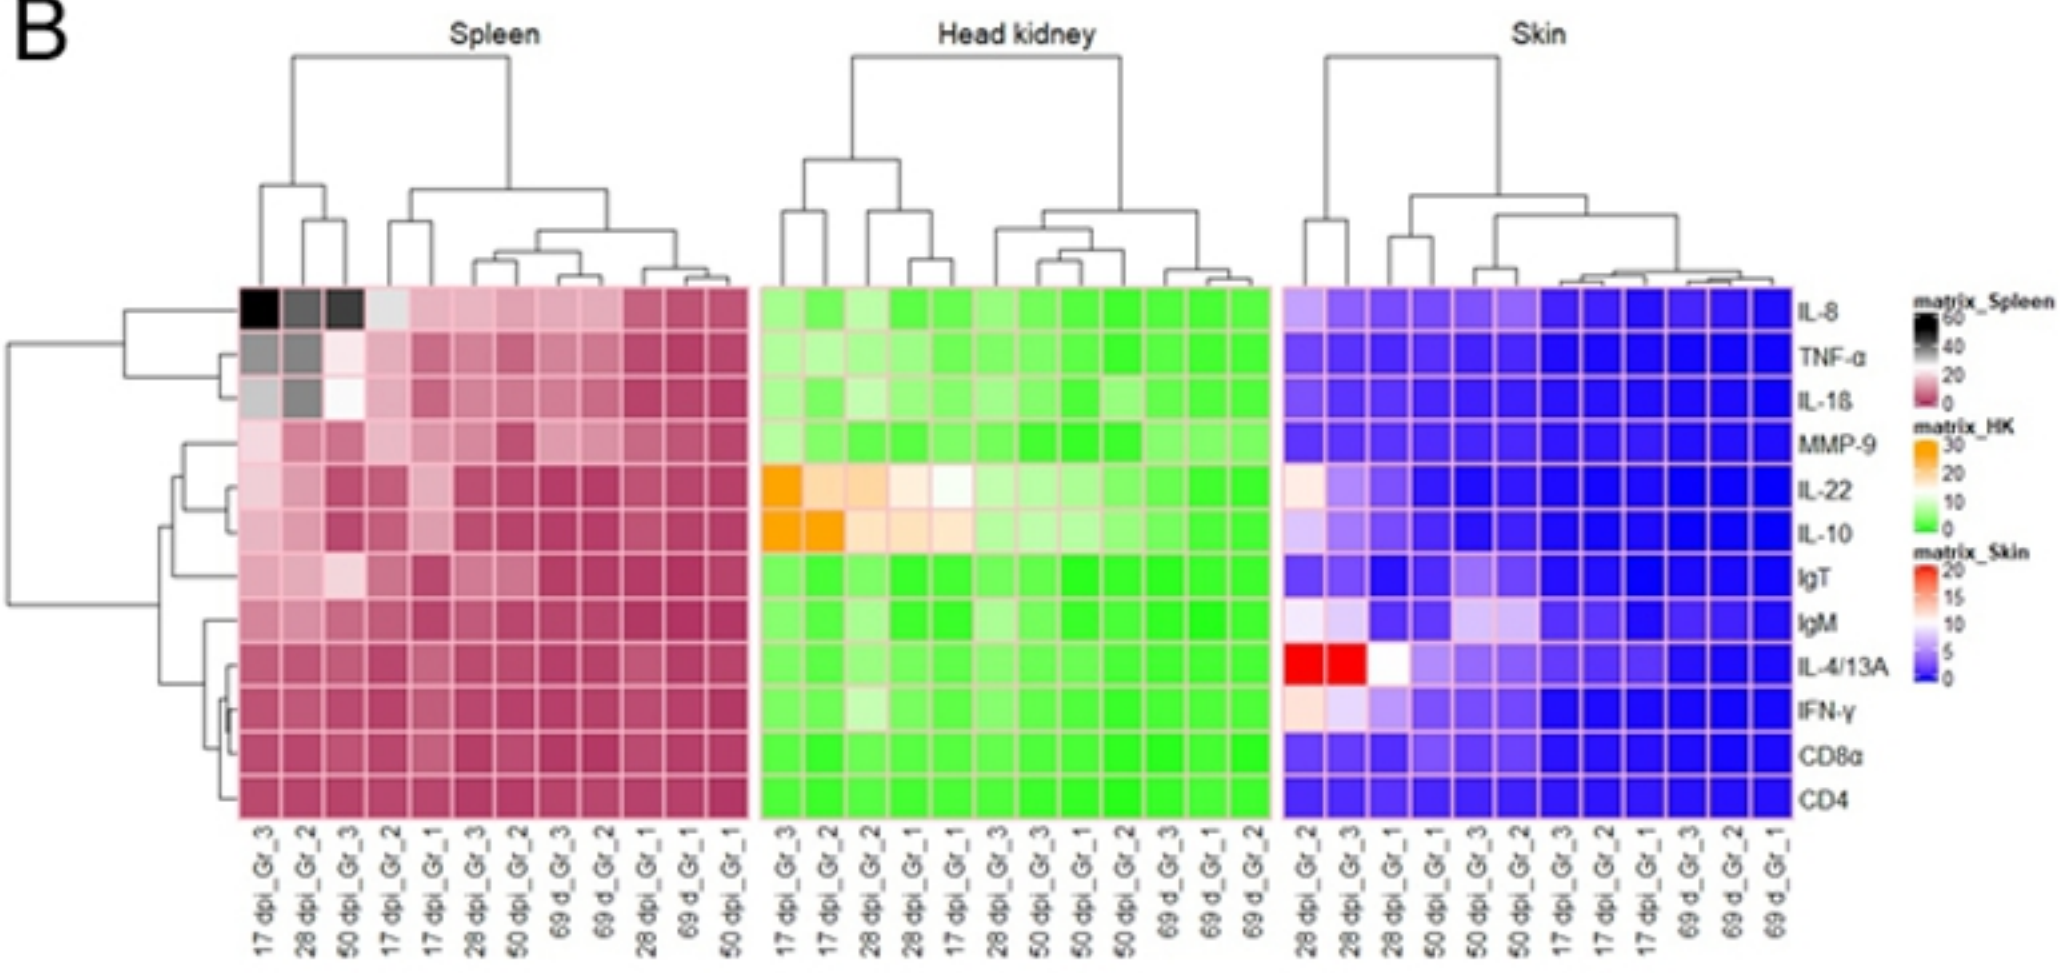

Figure 5



A

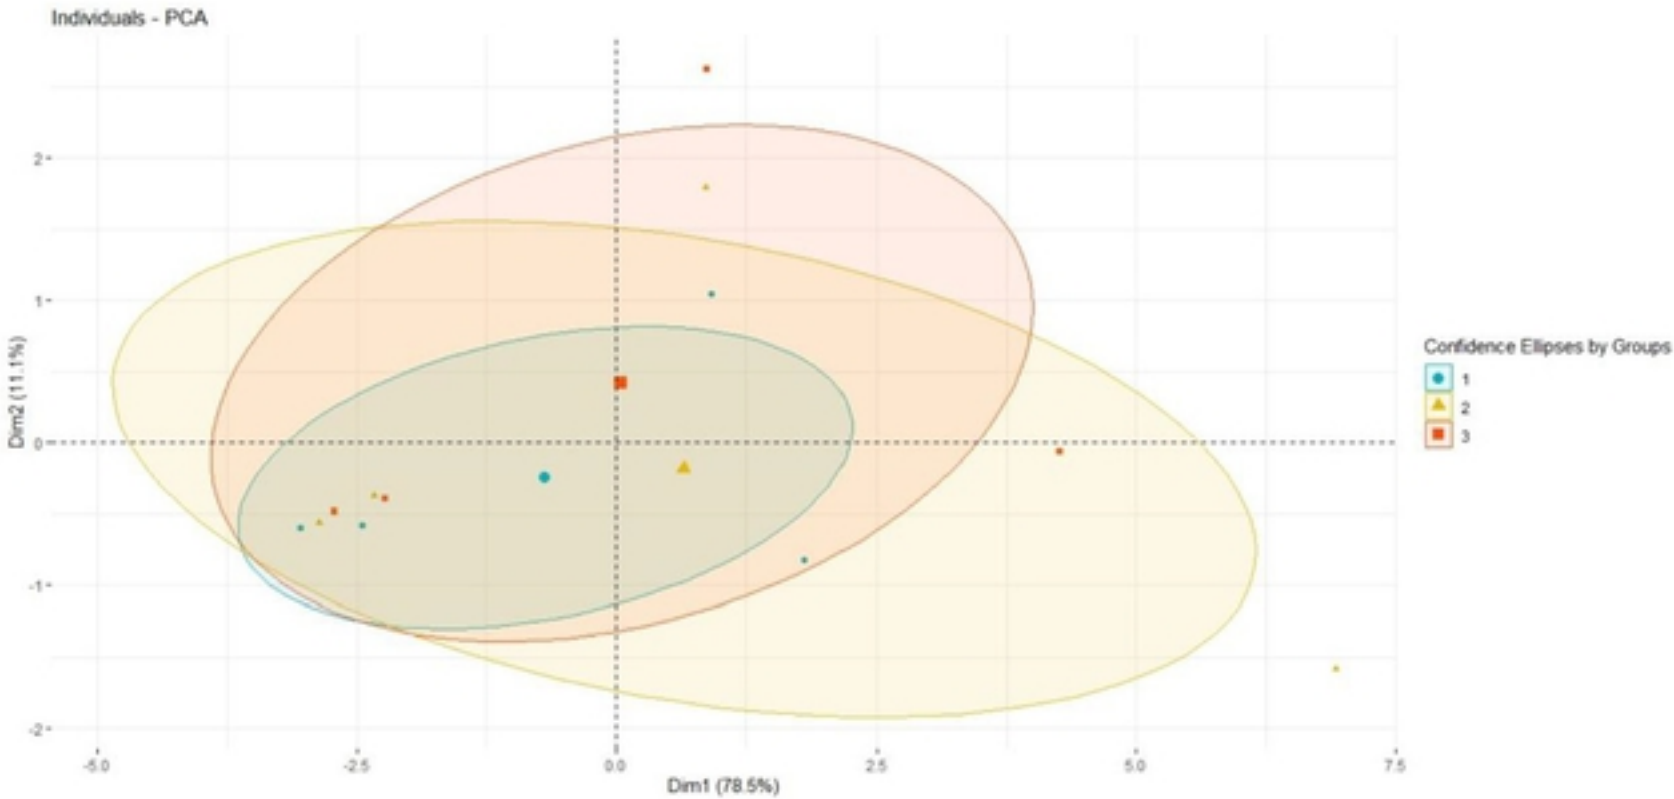

B

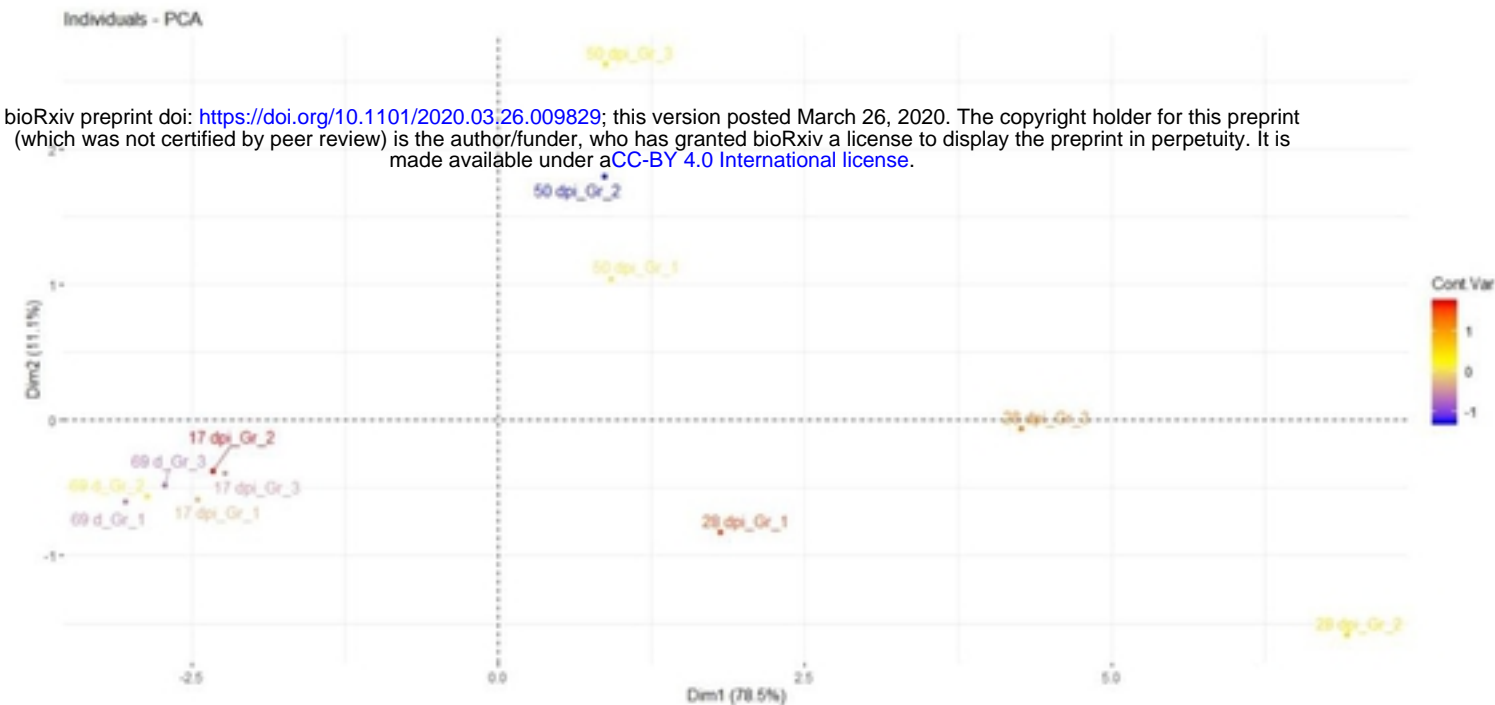

bioRxiv preprint doi: <https://doi.org/10.1101/2020.03.26.009829>; this version posted March 26, 2020. The copyright holder for this preprint (which was not certified by peer review) is the author/funder, who has granted bioRxiv a license to display the preprint in perpetuity. It is made available under aCC-BY 4.0 International license.

C

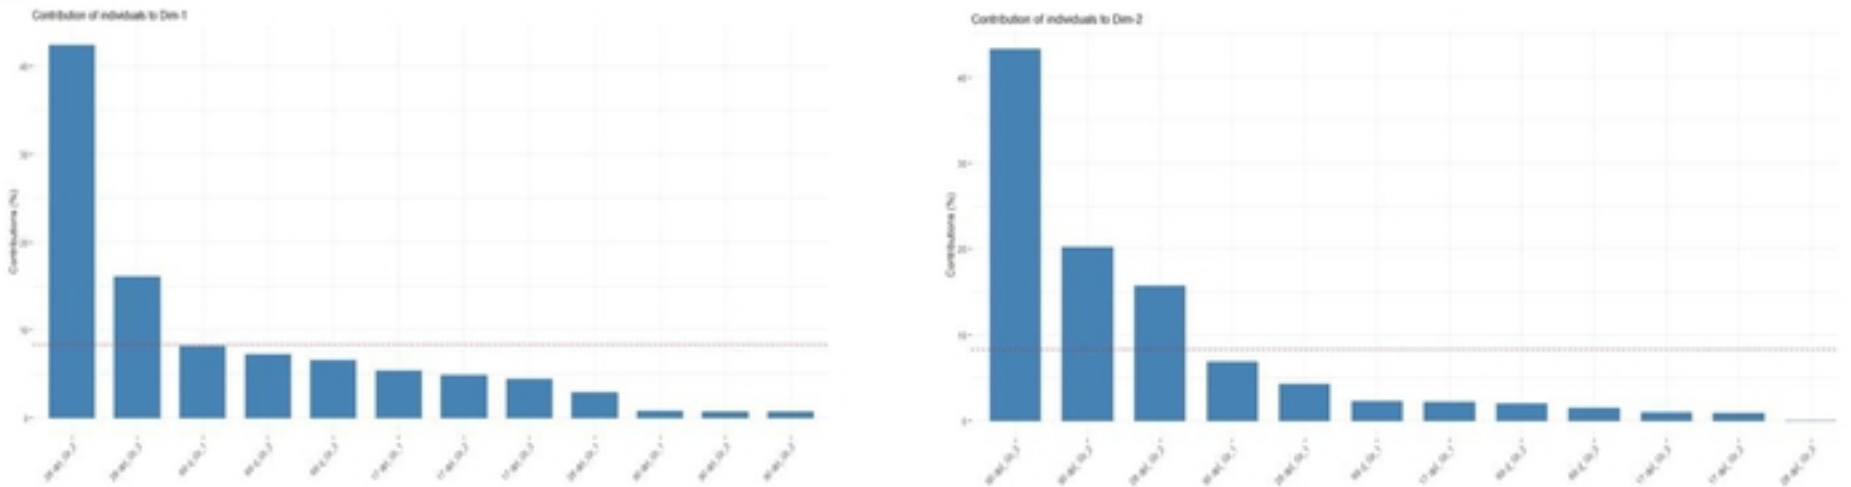

D

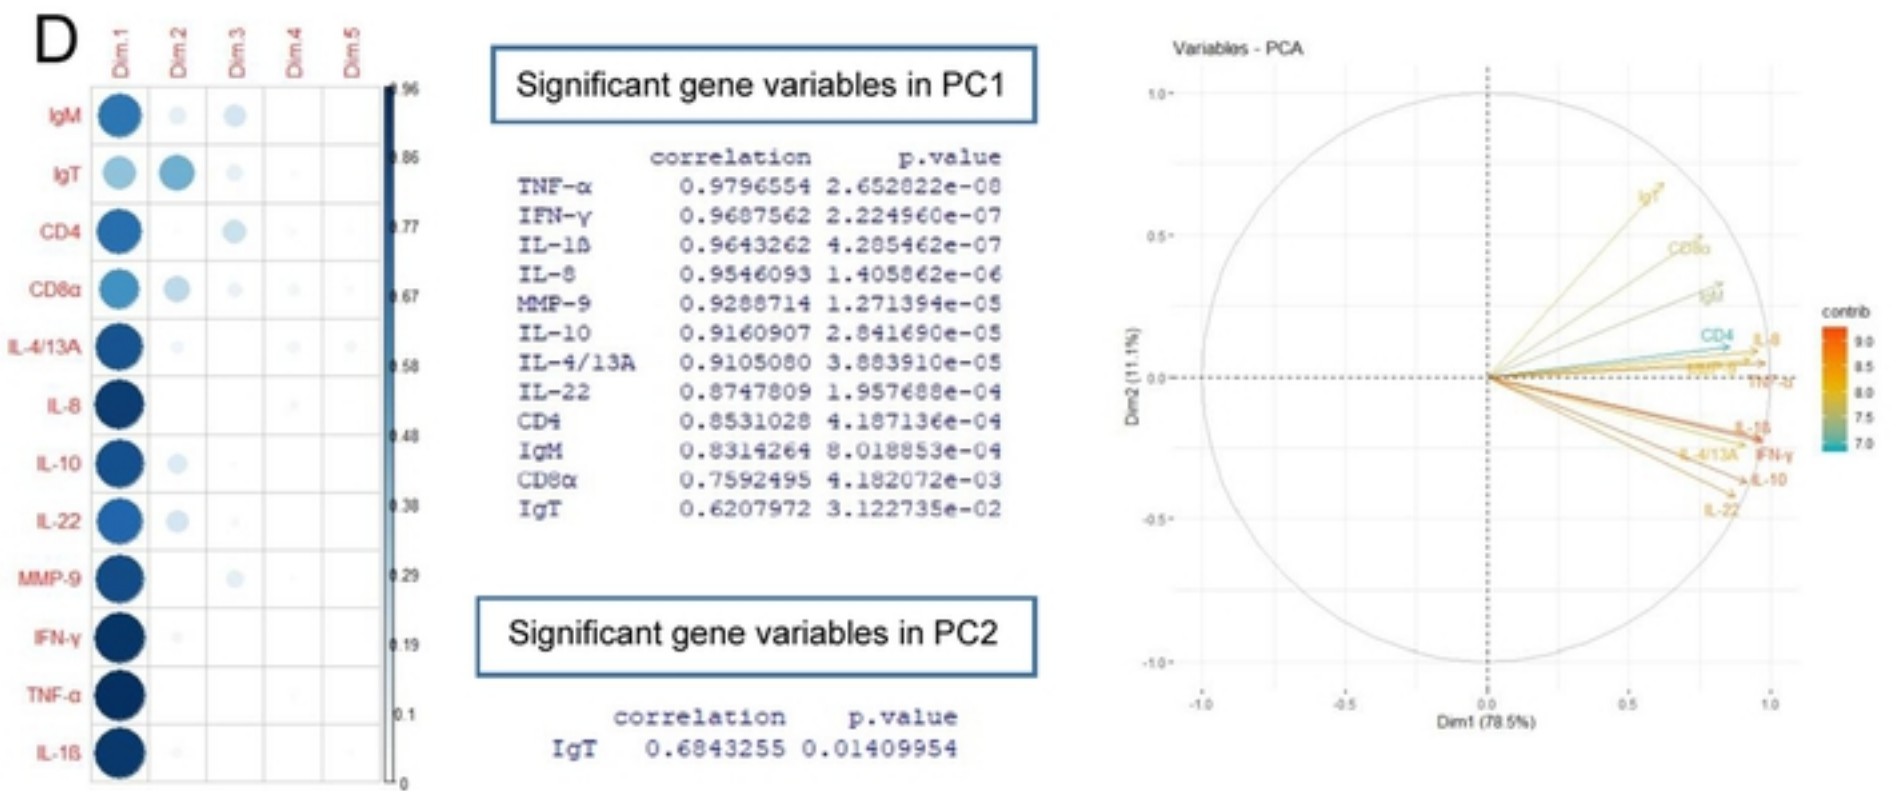

Figure 6
